# Supplementary material for: Genetic Similarity of Island Populations of Tent Caterpillars during Successive Outbreaks
Source: PLoS One. 2014 May 23;9(5):e96679. doi: 10.1371/journal.pone.0096679 (PMC4032236; doi:10.1371/journal.pone.0096679)
Supplement: Dataset S1 — Microsatellite data for the five Malacosoma californicum pluviale populations. (XLSX) [file pone.0096679.s001.xlsx]

## Sheet: Sheet1
8	248	10	18	41	20	31	26	30	30	11	30	11
			Gal03	Gal11	Mand03	Mand11	Pend03	Pend11	Sat03	Sat11	West03	West11
SampleID gel	Pop	A106-1	A106-2	A113-1	A113-2	A117-1	A117-2	B101-1	B101-2	B103-1	B103-2	B108-1	B108-2	B121-1	B121-2	B6-1	B6-2
gal140	Gal03	290	304	233	237	239	243	145	145	184	188	174	182	281	281	277	277
gal141	Gal03	0	0	229	235	243	271	145	167	180	184	0	0	275	281	267	275
gal142	Gal03	290	304	221	233	0	0	145	175	180	188	174	180	275	275	273	277
gal143	Gal03	314	318	221	229	239	245	145	169	180	192	174	186	281	281	267	277
gal144	Gal03	296	302	233	233	237	237	145	151	180	186	174	174	275	281	273	277
gal145	Gal03	292	316	225	235	251	267	145	151	180	188	182	182	275	281	269	269
gal146	Gal03	290	300	225	233	257	271	169	169	182	188	182	186	275	279	275	275
gal147	Gal03	308	310	233	233	239	253	151	169	182	188	174	174	281	281	267	277
gal148	Gal03	272	310	233	233	239	271	145	145	180	180	182	186	281	281	273	273
gal149	Gal03	304	316	233	233	245	271	145	145	180	180	182	182	277	281	271	275
gal150	Gal03	306	308	233	233	237	251	145	163	180	188	182	182	281	281	273	273
gal151	Gal03	292	336	231	235	237	257	145	169	180	182	0	0	281	281	277	277
gal152	Gal03	272	294	221	233	239	243	145	169	180	182	182	186	281	281	267	267
gal153	Gal03	308	310	231	235	237	239	145	151	182	186	182	182	281	281	267	277
gal154	Gal03	286	310	231	233	245	253	151	167	180	188	184	184	279	279	267	275
gal155	Gal03	272	302	231	233	245	271	147	151	180	182	184	184	281	281	269	277
gal156	Gal03	320	470	221	233	243	251	151	169	180	188	182	182	279	281	273	277
gal22-2003	Gal03	306	468	229	233	237	237	147	163	182	186	182	182	281	281	273	275
pcgal107	Gal11	308	314	229	235	237	271	151	169	180	192	174	174	279	281	273	277
gal12-1	Gal11	290	468	233	235	271	271	149	169	184	188	182	182	279	281	269	277
gal15-1	Gal11	290	320	221	229	245	245	157	169	180	190	174	174	279	281	275	275
gal18-1	Gal11	290	310	233	233	239	243	145	155	182	186	184	184	281	281	269	269
gal19-3	Gal11	296	320	233	235	251	251	149	169	180	188	182	182	277	281	277	277
gal22-7	Gal11	308	358	225	233	237	271	145	149	182	188	180	182	279	281	273	277
gal38-1	Gal11	298	468	225	233	243	259	145	149	180	182	174	174	279	281	267	273
gal39-1	Gal11	288	298	229	233	243	271	157	167	184	186	182	182	275	275	273	277
gal4-1	Gal11	292	468	231	231	239	257	169	169	182	192	174	174	281	281	269	277
gal45-1	Gal11	290	300	231	233	245	271	145	149	190	192	174	182	281	281	277	277
gal52-3	Gal11	290	296	229	233	247	271	167	175	184	188	0	0	275	281	0	0
pcgal35	Gal11	294	304	229	233	237	243	151	157	180	192	178	178	277	277	277	277
pcgal37	Gal11	310	468	221	233	241	249	145	157	180	188	180	180	281	281	273	277
pcgal38	Gal11	296	296	229	233	241	243	145	175	188	190	180	180	275	281	267	267
pcgal40	Gal11	0	0	229	233	233	243	159	159	184	190	180	180	281	281	267	273
pcgal41	Gal11	290	334	233	233	243	245	151	175	182	194	180	180	275	281	277	277
pcgal42	Gal11	290	468	225	233	239	245	151	157	184	188	178	178	277	281	273	273
pcgal43	Gal11	294	306	231	233	245	273	145	169	186	196	174	174	281	281	271	275
pcgal44	Gal11	308	318	225	229	239	245	145	145	180	188	180	180	279	281	271	277
pcgal47	Gal11	290	308	231	233	233	239	151	151	182	184	180	180	279	281	267	277
pcgal48	Gal11	308	334	229	233	245	271	145	159	180	190	180	180	281	281	275	277
pcgal55	Gal11	298	304	229	229	241	273	145	167	184	188	182	184	0	0	267	273
pcgal56	Gal11	292	308	229	233	245	251	145	163	180	188	178	182	275	281	275	275
pcgal57	Gal11	318	468	225	233	237	239	159	173	182	182	180	180	277	281	267	275
pcgal59	Gal11	304	316	233	235	241	273	151	159	182	184	182	182	279	281	273	277
pcgal60	Gal11	290	302	229	233	239	239	173	145	180	194	182	184	277	281	267	273
pcgal67	Gal11	316	468	229	231	245	271	145	145	180	182	0	0	281	281	269	277
pcgal73	Gal11	320	338	225	225	245	261	145	157	180	180	174	184	277	277	267	277
rand-gal-104	Gal11	296	296	229	233	237	243	159	175	180	188	182	184	275	275	267	277
rand108	Gal11	294	338	225	235	243	245	169	169	180	190	184	184	281	281	273	275
rand-gal-143	Gal11	304	316	229	233	237	243	151	157	184	188	184	184	275	281	267	277
rand-gal-146	Gal11	294	300	233	233	243	245	145	145	180	188	182	182	275	281	273	273
rand-gal-148	Gal11	290	316	225	233	247	249	167	167	182	182	184	184	281	281	267	277
rand-gal-152	Gal11	304	306	229	235	243	245	163	171	180	184	184	184	281	281	267	273
rand-gal-155	Gal11	290	306	221	231	239	247	145	167	190	194	180	180	281	281	271	275
rand-gal-159	Gal11	338	470	229	235	243	245	145	149	180	182	174	184	281	281	269	273
rand-gal-160	Gal11	296	468	221	235	237	239	149	149	184	188	182	182	281	281	277	277
rand-gal-167	Gal11	300	314	233	233	239	251	145	145	182	190	180	180	275	275	277	277
rand-gal-170	Gal11	298	334	231	233	0	0	169	175	180	184	178	182	281	281	267	273
rand-gal-171	Gal11	296	314	231	233	247	249	151	157	184	192	178	182	277	277	277	279
pc-rand-86	Gal11	290	298	233	233	239	245	151	151	180	182	178	178	279	279	277	277
mand120	Mand03	290	300	225	231	243	273	145	145	184	188	182	182	281	281	273	277
mand121	Mand03	290	298	225	229	241	245	145	157	180	192	184	184	281	281	271	273
mand122	Mand03	290	304	233	235	241	245	157	171	180	184	184	184	275	281	267	277
mand123	Mand03	294	300	225	229	239	273	145	169	180	186	184	184	279	281	271	271
mand124	Mand03	290	310	233	233	245	273	145	145	184	194	184	184	281	281	273	277
mand125	Mand03	304	316	231	235	237	271	157	157	180	180	180	180	281	281	277	277
mand126	Mand03	304	310	229	235	237	245	145	145	180	192	182	182	279	281	275	277
mand127	Mand03	310	312	231	233	0	0	163	169	184	186	184	184	281	281	0	0
mand128	Mand03	298	308	233	233	0	0	145	151	180	184	0	0	277	281	271	273
mand129	Mand03	290	316	225	229	245	273	145	151	180	194	174	184	281	281	277	277
mand130	Mand03	308	314	229	235	245	257	145	177	184	188	182	182	279	281	267	277
mand131	Mand03	302	306	233	235	237	247	145	169	180	186	182	182	281	281	273	273
mand132	Mand03	304	468	231	233	251	251	157	169	180	180	0	0	279	281	273	277
mand133	Mand03	290	298	225	233	273	273	159	171	186	186	182	182	281	281	267	277
mand134	Mand03	304	316	231	235	237	273	145	157	180	186	184	184	275	281	267	267
mand135	Mand03	0	0	233	235	239	247	145	151	182	184	182	182	277	281	267	273
mand136	Mand03	296	334	231	235	237	241	145	171	180	188	182	182	279	279	273	277
mand137	Mand03	290	296	233	233	237	245	145	151	180	182	182	182	279	281	271	273
mand138	Mand03	302	308	233	235	237	243	151	177	182	194	0	0	279	281	267	273
mand139	Mand03	306	306	231	237	243	249	145	169	184	188	182	182	281	281	275	275
mand2-2	Mand11	306	306	221	229	239	247	169	175	180	186	182	182	277	277	271	277
mand22-1	Mand11	302	334	233	233	243	273	163	155	180	186	182	182	281	281	267	269
mand24-1	Mand11	306	468	229	235	235	237	145	157	180	188	174	180	281	281	271	273
mand33-1	Mand11	304	468	221	233	247	255	151	169	184	184	180	182	275	275	273	277
mand39-1	Mand11	272	312	229	233	251	257	159	169	184	188	182	182	281	281	267	277
mand40-2	Mand11	298	298	233	233	237	245	145	169	184	190	180	180	277	281	277	277
mand41-1	Mand11	290	298	233	235	241	271	145	155	186	194	180	180	279	281	267	277
mand43-1	Mand11	306	306	229	229	241	271	145	145	180	188	176	176	281	281	275	277
mand47-1	Mand11	296	468	225	229	247	271	145	155	180	190	174	184	281	281	273	277
mand5-1	Mand11	304	468	229	233	245	245	151	169	188	188	176	182	281	281	271	279
mand50	Mand11	316	468	233	235	239	243	169	169	180	184	182	182	279	281	267	277
mand52-1	Mand11	312	312	225	235	239	247	145	145	180	180	184	184	281	281	273	277
mand56-1	Mand11	298	334	231	233	239	239	157	169	180	184	182	182	281	281	273	273
mand61-2	Mand11	316	334	229	233	237	245	145	159	180	190	182	182	281	281	273	277
mand63-2	Mand11	290	314	225	229	237	273	169	169	190	190	182	182	275	281	267	267
mand67-1	Mand11	298	300	229	233	233	239	145	157	180	190	184	184	281	281	277	277
mand69-1	Mand11	304	316	229	233	239	243	157	169	188	188	186	186	281	281	277	277
mand71-1	Mand11	290	300	229	233	237	257	157	169	182	192	174	182	281	281	277	277
rand-mand-113	Mand11	300	308	229	229	239	271	145	151	180	184	182	182	0	0	277	277
rand-mand-115	Mand11	306	316	233	233	237	239	145	151	180	180	182	182	281	281	267	273
rand-mand-118	Mand11	290	312	229	233	239	243	159	169	180	184	174	184	279	281	277	277
rand-mand-119	Mand11	312	338	229	235	237	239	163	169	180	184	184	184	281	281	269	273
rand-mand-121	Mand11	306	338	233	233	239	273	157	163	184	188	174	182	281	281	267	273
rand-mand-122	Mand11	298	312	231	233	247	271	145	145	182	182	180	180	281	281	275	277
rand-mand-123	Mand11	306	468	229	229	243	271	157	157	180	184	182	182	281	281	271	273
rand-mand-126	Mand11	300	314	225	229	239	239	169	169	180	180	184	184	281	281	273	277
rand-mand-127	Mand11	306	312	233	235	247	273	151	157	180	180	174	174	275	281	273	273
rand-mand-128	Mand11	292	300	233	233	237	271	157	169	182	182	182	182	275	281	273	273
rand-mand-131	Mand11	298	468	221	237	249	251	145	157	180	184	182	182	281	281	273	277
rand-mand-133	Mand11	314	320	225	229	237	273	157	167	180	190	180	180	275	281	273	273
rand-mand-134	Mand11	310	320	229	233	237	245	145	157	180	184	182	182	277	281	267	275
pender1	Pend03	334	338	229	233	237	253	157	169	182	186	182	182	277	281	267	277
pender35	Pend03	290	290	0	0	237	271	157	157	182	190	184	184	275	281	267	275
pender36	Pend03	0	0	229	233	239	273	145	155	180	184	178	182	281	281	273	277
pender37	Pend03	298	300	231	233	237	237	151	151	182	184	182	184	277	281	275	275
pender38	Pend03	318	338	229	235	239	245	169	169	184	184	180	180	281	281	277	277
pender39	Pend03	0	0	229	233	241	243	145	157	182	194	182	182	281	281	0	0
pender40	Pend03	290	468	231	233	243	273	145	169	180	180	182	184	279	279	267	273
pender41	Pend03	0	0	225	233	233	259	155	169	186	190	0	0	281	281	273	277
pender42	Pend03	0	0	233	235	237	273	0	0	180	180	0	0	281	281	0	0
pender43	Pend03	298	302	229	231	239	263	145	169	182	188	174	174	275	275	273	273
pender44	Pend03	0	0	0	0	0	0	147	157	0	0	174	182	0	0	267	271
pender45	Pend03	0	0	229	233	241	273	151	157	0	0	178	178	281	281	273	277
pender46	Pend03	294	468	229	233	233	239	145	151	0	0	182	182	281	281	277	277
pender47	Pend03	0	0	233	233	233	243	151	167	180	180	178	180	281	281	273	277
pender48	Pend03	298	462	229	233	241	243	151	169	180	180	184	184	281	281	273	277
pender49	Pend03	468	468	231	233	237	247	145	151	180	184	184	184	0	0	273	277
pender50	Pend03	332	332	233	233	245	271	163	169	180	180	178	182	281	281	267	277
pender51	Pend03	0	0	233	233	233	245	151	157	180	180	0	0	0	0	273	277
pender52	Pend03	0	0	0	0	0	0	0	0	0	0	0	0	281	281	0	0
pender53	Pend03	290	334	221	233	245	247	145	159	180	180	180	182	281	281	271	275
pender54	Pend03	290	300	221	235	237	271	145	151	180	188	174	174	275	275	267	273
pender55	Pend03	308	310	221	235	241	251	151	163	180	180	184	184	281	281	275	275
pender56	Pend03	298	306	221	229	237	243	155	169	180	188	182	182	281	281	267	267
pender57	Pend03	290	296	225	233	239	245	145	169	180	180	174	182	277	277	273	277
pender58	Pend03	290	304	233	233	0	0	163	169	180	180	182	182	275	275	273	277
pc-pend-59	Pend03	298	300	221	229	237	243	151	169	182	182	180	184	277	281	273	273
pc-pend-for-11-2011	Pend11	300	316	231	231	243	271	169	169	186	188	182	182	281	281	267	279
pc-pend-for-12-2011	Pend11	300	468	229	233	243	243	157	159	180	186	182	182	277	281	273	277
pc-pend-for-13-2011	Pend11	292	312	233	235	239	251	155	157	180	190	182	182	277	281	0	0
pc-pend-for-14-2011	Pend11	292	470	225	231	239	239	151	167	180	180	174	182	277	279	279	279
pc-pend-for-15-2011	Pend11	302	310	229	237	243	245	151	169	184	188	180	180	281	281	277	277
pc-pend-for-16-2011	Pend11	304	320	221	231	237	245	151	169	180	184	184	184	281	281	277	277
pc-pend-for-18-2011	Pend11	300	302	233	233	239	259	157	169	180	188	174	184	279	279	0	0
pc-pend-for-19-2011	Pend11	312	468	225	229	239	263	151	163	184	184	182	182	0	0	277	277
pc-pend-for-2-2011	Pend11	300	338	229	233	239	251	145	151	182	188	182	182	281	281	275	275
pc-pend-for-20-2011	Pend11	308	316	229	235	237	245	145	145	180	186	178	182	281	281	277	277
pc-pend-for-21-2011	Pend11	300	300	229	233	247	273	145	175	180	180	182	182	279	281	273	279
pc-pend-for-23-2011	Pend11	302	302	221	229	239	239	159	169	184	188	180	184	281	281	275	277
pc-pend-for-24-2011	Pend11	284	304	233	233	243	273	157	181	184	186	182	182	0	0	277	277
pc-pend-for-25-2011	Pend11	312	468	233	237	271	271	145	159	180	190	182	182	281	281	267	273
pc-pend-for-26-2011	Pend11	308	314	233	233	241	245	145	159	184	188	178	178	281	281	277	277
pc-pend-for-28-2011	Pend11	292	308	231	235	241	245	145	169	188	192	174	182	281	281	267	273
pc-pend-for-29-2011	Pend11	306	312	231	233	271	271	149	159	182	190	178	184	281	281	277	277
pc-pend-for-3-2011	Pend11	304	306	233	233	237	239	145	169	188	190	182	184	275	275	273	277
pc-pend-for-30-2011	Pend11	310	470	233	233	241	245	145	171	184	188	184	184	275	275	277	277
pc-pend-for-33-2011	Pend11	306	314	233	233	239	273	145	151	182	188	180	184	275	281	271	275
pc-pend-for-34-2011	Pend11	304	338	231	233	241	241	151	175	180	188	182	182	281	281	267	277
pc-pend-for-35-2011	Pend11	306	312	229	229	239	241	145	173	188	188	182	182	277	277	273	277
pc-pend-for-36-2011	Pend11	302	314	225	233	239	243	149	149	182	188	182	182	281	281	277	277
pc-pend-for-37-2011	Pend11	286	290	231	235	243	271	149	159	180	184	0	0	281	281	273	277
pc-pend-for-38-2011	Pend11	290	304	229	233	237	273	145	179	180	192	182	182	281	281	267	277
pc-pend-for-40-2011	Pend11	300	306	225	229	245	245	151	169	180	180	182	182	281	281	267	267
pc-pend-for-5-2011	Pend11	310	318	233	233	239	243	145	151	180	184	178	184	281	281	277	277
pc-pend-for-6-2011	Pend11	310	468	225	233	237	247	145	169	180	182	182	184	277	281	277	277
pc-pend-for-7-2011	Pend11	304	310	233	233	237	251	145	149	180	180	174	182	0	0	277	277
pc-pend-for-8-2011	Pend11	294	296	233	235	237	239	145	151	180	188	180	182	279	279	277	277
pc-agcan-60	Sat03	290	296	233	235	245	271	145	151	182	182	180	180	279	279	267	275
pc-agcan-61	Sat03	290	318	227	231	245	247	151	169	180	186	182	182	281	281	277	277
pc-agcan-62	Sat03	290	338	231	233	245	251	157	163	184	190	180	184	275	281	277	277
pc-agcan-63	Sat03	290	312	231	233	247	251	145	169	180	182	182	182	279	281	277	277
pc-agcan-64	Sat03	304	306	233	233	237	239	141	151	188	194	0	0	279	281	271	277
pc-agcan-65	Sat03	338	348	231	233	239	271	145	145	182	186	178	178	275	275	275	277
pc-agcan-66	Sat03	290	290	233	235	239	247	145	145	186	188	182	182	279	281	277	277
pc-agcan-67	Sat03	310	316	233	233	239	243	159	169	180	182	178	184	277	277	0	0
pc-agcan-68	Sat03	338	468	233	235	271	273	145	151	182	194	182	184	281	281	271	277
pc-agcan-69	Sat03	306	322	229	233	237	245	145	151	182	182	178	180	281	281	273	277
pc-agcan-70	Sat03	306	338	229	233	239	243	145	151	184	190	182	182	281	281	267	273
pc-agcan-71	Sat03	290	292	229	235	235	239	145	157	182	184	180	184	281	281	277	277
pc-agcan-72	Sat03	310	310	229	231	237	237	145	151	188	190	180	180	275	281	273	273
pc-agcan-73	Sat03	304	304	231	233	243	273	169	173	184	194	182	182	277	277	277	277
pc-agcan-74	Sat03	304	468	233	233	235	237	145	151	190	190	182	182	277	277	273	273
pc-agcan-75	Sat03	0	0	0	0	0	0	0	0	0	0	0	0	0	0	0	0
pc-agcan-76	Sat03	310	312	233	233	239	271	145	151	184	188	182	182	275	279	275	277
pc-agcan-77	Sat03	318	338	233	233	239	251	145	151	0	0	0	0	279	279	271	277
pc-agcan-78	Sat03	300	314	225	233	239	245	151	151	180	184	178	178	279	281	267	271
pc-agcan-79	Sat03	0	0	0	0	239	271	0	0	0	0	0	0	281	281	273	277
pc-agcan-80	Sat03	290	306	229	233	243	245	151	169	184	188	182	182	281	281	275	275
pc-agcan-81	Sat03	298	298	229	233	247	273	145	145	180	182	180	184	279	281	0	0
pc-agcan-82	Sat03	300	306	229	231	239	271	145	155	180	184	178	182	277	277	273	273
pc-agcan-83	Sat03	296	298	229	235	239	245	155	155	180	188	184	184	281	281	277	277
pc-agcan-84	Sat03	304	304	233	233	239	239	155	175	182	188	180	180	275	281	269	275
pc-agcan-85	Sat03	0	0	233	233	247	247	151	169	180	184	0	0	281	281	267	273
pc-agcan-86	Sat03	338	468	229	233	245	249	145	145	182	182	174	182	281	281	267	275
pc-agcan-87	Sat03	0	0	221	233	249	251	145	145	182	184	174	182	277	281	277	277
pc-agcan-88	Sat03	0	0	0	0	243	245	0	0	0	0	0	0	281	281	271	277
pc-agcan-89	Sat03	0	0	225	233	239	271	0	0	180	188	182	184	281	281	273	277
pc-sat-10-2011	Sat11	296	328	221	229	237	239	145	159	184	186	184	184	281	281	267	277
pc-sat-11-2011	Sat11	298	314	231	233	237	239	151	157	184	184	0	0	281	281	273	275
pc-sat-12-2011	Sat11	298	304	231	231	237	237	151	151	180	188	184	184	279	279	267	275
pc-sat-3-2011	Sat11	304	312	235	235	271	273	145	151	184	184	180	184	281	281	267	277
pc-sat-5-2011	Sat11	308	308	221	231	235	241	167	169	180	180	182	182	275	281	267	277
pc-sat-8-2011	Sat11	290	316	221	233	241	247	145	145	180	188	0	0	281	281	267	273
pc-sat-9-2011	Sat11	304	312	233	235	241	245	145	165	184	188	174	182	281	281	267	277
sat-3-4-2011	Sat11	300	322	233	235	239	241	145	151	184	188	184	184	281	281	273	277
sat-5-1-2011	Sat11	334	342	221	233	245	251	145	151	182	186	180	180	281	281	277	277
sat-7-1-2011	Sat11	272	304	231	233	267	271	157	181	180	180	182	186	279	279	277	277
sat-9-1-2011	Sat11	290	300	233	235	237	257	145	155	184	188	184	184	275	281	275	277
west1-10	West03	306	310	233	235	239	239	151	157	182	188	180	184	275	281	267	277
west1-11	West03	290	298	225	231	239	271	145	151	180	184	182	182	279	281	267	271
west1-12	West03	300	308	233	233	239	251	169	169	0	0	182	186	277	281	267	277
west1-13	West03	302	310	231	233	239	251	145	155	180	188	182	182	277	281	277	277
west1-14	West03	302	336	233	235	239	273	169	181	184	188	180	184	0	0	273	277
west1-5	West03	468	468	233	233	239	257	145	169	180	188	180	184	281	281	273	277
west1-6	West03	310	338	231	233	245	271	145	145	186	186	184	184	275	281	267	275
west1-7	West03	308	468	225	233	239	257	151	169	180	180	174	180	277	281	275	275
west1-8	West03	294	314	225	231	239	243	159	169	180	180	182	184	275	281	277	277
west1-9	West03	338	338	233	235	239	247	151	169	180	194	182	182	281	281	267	273
westII-15	West03	310	334	229	231	0	0	151	157	180	184	184	184	281	281	267	273
westII-16	West03	290	338	225	233	243	243	145	151	0	0	174	182	277	281	267	271
westII-17	West03	304	304	229	231	0	0	145	151	182	194	184	184	281	281	267	267
westII-18	West03	290	296	233	233	237	249	145	157	180	190	0	0	275	275	273	273
westII-19	West03	296	316	233	233	239	271	151	169	184	184	184	184	281	281	273	279
westII-20	West03	290	304	233	233	237	271	151	169	180	188	182	182	281	281	267	273
westII-21	West03	290	468	221	235	245	273	145	181	182	184	182	184	281	281	273	277
westII-22	West03	298	314	233	233	239	247	145	157	180	186	174	182	281	281	273	277
westII-23	West03	298	310	229	233	243	245	151	151	182	188	176	182	275	275	275	275
westII-24	West03	310	312	233	233	239	273	145	151	180	190	182	184	275	275	277	277
westIII-25	West03	316	468	221	233	239	247	157	169	0	0	184	184	281	281	267	277
westIII-26	West03	272	298	225	229	237	257	151	151	184	188	182	182	279	281	267	277
westIII-27	West03	304	314	229	233	245	271	145	145	180	198	178	178	279	281	275	275
westIII-28	West03	310	310	233	235	273	273	145	157	180	180	180	180	281	281	0	0
westIII-29	West03	308	468	229	233	233	241	145	167	180	180	174	182	281	281	277	277
westIII-30	West03	296	304	233	233	233	243	169	169	182	188	176	180	281	281	267	267
westIII-31	West03	290	312	233	233	239	273	145	167	182	184	178	178	281	281	273	277
westIII-32	West03	290	290	229	233	239	247	145	151	180	188	184	184	281	281	277	277
westIII-33	West03	272	296	221	233	239	249	145	169	180	188	174	174	279	279	267	277
westIII-34	West03	290	310	229	233	243	271	151	157	180	186	182	182	281	281	277	277
west1-1-2011	West11	302	470	233	233	245	271	145	169	180	190	182	184	0	0	267	275
west11-2-2011	West11	304	468	229	231	243	245	145	145	182	188	184	184	279	279	267	271
west13-1-2011	West11	306	306	229	233	237	239	145	151	180	184	174	184	275	281	273	273
west14-1-2011	West11	0	0	221	225	239	251	169	179	180	188	174	182	277	277	0	0
west15-1-2011	West11	312	468	233	233	239	251	145	155	180	180	178	182	277	281	277	277
west17-1-2011	West11	298	304	231	233	243	245	151	163	182	188	182	182	277	281	267	271
west3-1-2011	West11	312	468	229	233	239	257	151	157	180	184	174	180	281	281	273	277
west4-1-2011	West11	0	0	0	0	237	245	151	151	0	0	178	178	281	281	0	0
west5-2-2011	West11	300	316	233	233	239	239	145	145	184	184	186	186	277	277	267	273
west6-1-2011	West11	0	0	0	0	0	0	151	151	0	0	0	0	281	281	0	0
west9-1-2011	West11	296	320	229	233	237	239	151	151	188	190	180	182	277	279	267	273

## Sheet: HW
Outcomes of Tests for Hardy-Weinberg Equilibrium
Data Sheet	Sheet1
Data Title
No. Loci	8
No. Samples	248
No. Pops.	10
Pop	Gal03
Locus	A106-1
Summary
Genotype	#Observed	#Expected
272272	0	0.132353
272286	0	0.0882353
286286	0	0.0147059
272290	0	0.264706
286290	0	0.0882353
290290	0	0.132353
272292	0	0.176471
286292	0	0.0588235
290292	0	0.176471
292292	0	0.0588235
272294	1	0.0882353
286294	0	0.0294118
290294	0	0.0882353
292294	0	0.0588235
294294	0	0.0147059
272296	0	0.0882353
286296	0	0.0294118
290296	0	0.0882353
292296	0	0.0588235
294296	0	0.0294118
296296	0	0.0147059
272300	0	0.0882353
286300	0	0.0294118
290300	1	0.0882353
292300	0	0.0588235
294300	0	0.0294118
296300	0	0.0294118
300300	0	0.0147059
272302	1	0.176471
286302	0	0.0588235
290302	0	0.176471
292302	0	0.117647
294302	0	0.0588235
296302	1	0.0588235
300302	0	0.0588235
302302	0	0.0588235
272304	0	0.264706
286304	0	0.0882353
290304	2	0.264706
292304	0	0.176471
294304	0	0.0882353
296304	0	0.0882353
300304	0	0.0882353
302304	0	0.176471
304304	0	0.132353
272306	0	0.176471
286306	0	0.0588235
290306	0	0.176471
292306	0	0.117647
294306	0	0.0588235
296306	0	0.0588235
300306	0	0.0588235
302306	0	0.117647
304306	0	0.176471
306306	0	0.0588235
272308	0	0.264706
286308	0	0.0882353
290308	0	0.264706
292308	0	0.176471
294308	0	0.0882353
296308	0	0.0882353
300308	0	0.0882353
302308	0	0.176471
304308	0	0.264706
306308	1	0.176471
308308	0	0.132353
272310	1	0.352941
286310	1	0.117647
290310	0	0.352941
292310	0	0.235294
294310	0	0.117647
296310	0	0.117647
300310	0	0.117647
302310	0	0.235294
304310	0	0.352941
306310	0	0.235294
308310	2	0.352941
310310	0	0.235294
272314	0	0.0882353
286314	0	0.0294118
290314	0	0.0882353
292314	0	0.0588235
294314	0	0.0294118
296314	0	0.0294118
300314	0	0.0294118
302314	0	0.0588235
304314	0	0.0882353
306314	0	0.0588235
308314	0	0.0882353
310314	0	0.117647
314314	0	0.0147059
272316	0	0.176471
286316	0	0.0588235
290316	0	0.176471
292316	1	0.117647
294316	0	0.0588235
296316	0	0.0588235
300316	0	0.0588235
302316	0	0.117647
304316	1	0.176471
306316	0	0.117647
308316	0	0.176471
310316	0	0.235294
314316	0	0.0588235
316316	0	0.0588235
272318	0	0.0882353
286318	0	0.0294118
290318	0	0.0882353
292318	0	0.0588235
294318	0	0.0294118
296318	0	0.0294118
300318	0	0.0294118
302318	0	0.0588235
304318	0	0.0882353
306318	0	0.0588235
308318	0	0.0882353
310318	0	0.117647
314318	1	0.0294118
316318	0	0.0588235
318318	0	0.0147059
272320	0	0.0882353
286320	0	0.0294118
290320	0	0.0882353
292320	0	0.0588235
294320	0	0.0294118
296320	0	0.0294118
300320	0	0.0294118
302320	0	0.0588235
304320	0	0.0882353
306320	0	0.0588235
308320	0	0.0882353
310320	0	0.117647
314320	0	0.0294118
316320	0	0.0588235
318320	0	0.0294118
320320	0	0.0147059
272336	0	0.0882353
286336	0	0.0294118
290336	0	0.0882353
292336	1	0.0588235
294336	0	0.0294118
296336	0	0.0294118
300336	0	0.0294118
302336	0	0.0588235
304336	0	0.0882353
306336	0	0.0588235
308336	0	0.0882353
310336	0	0.117647
314336	0	0.0294118
316336	0	0.0588235
318336	0	0.0294118
320336	0	0.0294118
336336	0	0.0147059
272468	0	0.0882353
286468	0	0.0294118
290468	0	0.0882353
292468	0	0.0588235
294468	0	0.0294118
296468	0	0.0294118
300468	0	0.0294118
302468	0	0.0588235
304468	0	0.0882353
306468	1	0.0588235
308468	0	0.0882353
310468	0	0.117647
314468	0	0.0294118
316468	0	0.0588235
318468	0	0.0294118
320468	0	0.0294118
336468	0	0.0294118
468468	0	0.0147059
272470	0	0.0882353
286470	0	0.0294118
290470	0	0.0882353
292470	0	0.0588235
294470	0	0.0294118
296470	0	0.0294118
300470	0	0.0294118
302470	0	0.0588235
304470	0	0.0882353
306470	0	0.0588235
308470	0	0.0882353
310470	0	0.117647
314470	0	0.0294118
316470	0	0.0588235
318470	0	0.0294118
320470	1	0.0294118
336470	0	0.0294118
468470	0	0.0294118
470470	0	0.0147059
ChiSquare	187.944
DF	171
Prob	0.177901	ns
Pop	Gal03
Locus	A113-1
Summary
Genotype	#Observed	#Expected
221221	0	0.222222
221225	0	0.222222
225225	0	0.0555556
221229	1	0.333333
225229	0	0.166667
229229	0	0.125
221231	0	0.444444
225231	0	0.222222
229231	0	0.333333
231231	0	0.222222
221233	3	2
225233	1	1
229233	1	1.5
231233	2	2
233233	5	4.5
221235	0	0.444444
225235	1	0.222222
229235	1	0.333333
231235	2	0.444444
233235	0	2
235235	0	0.222222
221237	0	0.111111
225237	0	0.0555556
229237	0	0.0833333
231237	0	0.111111
233237	1	0.5
235237	0	0.111111
237237	0	0.0138889
ChiSquare	17.2222
DF	21
Prob	0.69755	ns
Pop	Gal03
Locus	A117-1
Summary
Genotype	#Observed	#Expected
237237	2	0.720588
237239	1	1.23529
239239	0	0.529412
237243	0	0.823529
239243	2	0.705882
243243	0	0.235294
237245	0	0.823529
239245	1	0.705882
243245	0	0.470588
245245	0	0.235294
237251	1	0.617647
239251	0	0.529412
243251	1	0.352941
245251	0	0.352941
251251	0	0.132353
237253	0	0.411765
239253	1	0.352941
243253	0	0.235294
245253	1	0.235294
251253	0	0.176471
253253	0	0.0588235
237257	1	0.411765
239257	0	0.352941
243257	0	0.235294
245257	0	0.235294
251257	0	0.176471
253257	0	0.117647
257257	0	0.0588235
237267	0	0.205882
239267	0	0.176471
243267	0	0.117647
245267	0	0.117647
251267	1	0.0882353
253267	0	0.0588235
257267	0	0.0588235
267267	0	0.0147059
237271	0	1.02941
239271	1	0.882353
243271	1	0.588235
245271	2	0.588235
251271	0	0.441176
253271	0	0.294118
257271	1	0.294118
267271	0	0.147059
271271	0	0.367647
ChiSquare	34.7748
DF	36
Prob	0.526775	ns
Pop	Gal03
Locus	B101-1
Summary
Genotype	#Observed	#Expected
145145	3	3.125
145147	0	0.833333
147147	0	0.0555556
145151	3	2.91667
147151	1	0.388889
151151	0	0.680556
145163	1	0.833333
147163	1	0.111111
151163	0	0.388889
163163	0	0.0555556
145167	1	0.833333
147167	0	0.111111
151167	1	0.388889
163167	0	0.111111
167167	0	0.0555556
145169	3	2.91667
147169	0	0.388889
151169	2	1.36111
163169	0	0.388889
167169	0	0.388889
169169	1	0.680556
145175	1	0.416667
147175	0	0.0555556
151175	0	0.194444
163175	0	0.0555556
167175	0	0.0555556
169175	0	0.194444
175175	0	0.0138889
ChiSquare	14.4024
DF	21
Prob	0.8517	ns
Pop	Gal03
Locus	B103-1
Summary
Genotype	#Observed	#Expected
180180	2	3.125
180182	3	2.91667
182182	0	0.680556
180184	1	0.833333
182184	0	0.388889
184184	0	0.0555556
180186	1	1.25
182186	2	0.583333
184186	0	0.166667
186186	0	0.125
180188	5	3.33333
182188	2	1.55556
184188	1	0.444444
186188	0	0.666667
188188	0	0.888889
180192	1	0.416667
182192	0	0.194444
184192	0	0.0555556
186192	0	0.0833333
188192	0	0.222222
192192	0	0.0138889
ChiSquare	9.94429
DF	15
Prob	0.82323	ns
Pop	Gal03
Locus	B108-1
Summary
Genotype	#Observed	#Expected
174174	2	0.765625
174180	1	0.21875
180180	0	0.015625
174182	1	3.5
180182	0	0.5
182182	6	4
174184	0	0.875
180184	0	0.125
182184	0	2
184184	2	0.25
174186	1	0.875
180186	0	0.125
182186	3	2
184186	0	0.5
186186	0	0.25
ChiSquare	24.7245
DF	10
Prob	0.00589292	**
Pop	Gal03
Locus	B121-1
Summary
Genotype	#Observed	#Expected
275275	1	0.5
275277	0	0.166667
277277	0	0.0138889
275279	1	0.666667
277279	0	0.111111
279279	1	0.222222
275281	3	4.16667
277281	1	0.694444
279281	1	2.77778
281281	10	8.68056
ChiSquare	5.48
DF	6
Prob	0.483877	ns
Pop	Gal03
Locus	B6-1
Summary
Genotype	#Observed	#Expected
267267	1	0.680556
267269	0	0.583333
269269	1	0.125
267271	0	0.194444
269271	0	0.0833333
271271	0	0.0138889
267273	0	1.55556
269273	0	0.666667
271273	0	0.222222
273273	2	0.888889
267275	2	1.16667
269275	0	0.5
271275	1	0.166667
273275	1	1.33333
275275	1	0.5
267277	3	2.13889
269277	1	0.916667
271277	0	0.305556
273277	3	2.44444
275277	0	1.83333
277277	2	1.68056
ChiSquare	19.5086
DF	15
Prob	0.191603	ns
Summary by locus for Gal03
Locus	ChiSquare	DF	Prob
A106-1	187.944	171	0.177901	ns
A113-1	17.2222	21	0.69755	ns
A117-1	34.7748	36	0.526775	ns
B101-1	14.4024	21	0.8517	ns
B103-1	9.94429	15	0.82323	ns
B108-1	24.7245	10	0.00589292	**
B121-1	5.48	6	0.483877	ns
B6-1	19.5086	15	0.191603	ns
Pop	Gal11
Locus	A106-1
Summary
Genotype	#Observed	#Expected
288288	0	0.00625
288290	0	0.15
290290	0	0.9
288292	0	0.025
290292	0	0.3
292292	0	0.025
288294	0	0.05
290294	0	0.6
292294	0	0.1
294294	0	0.1
288296	0	0.1
290296	1	1.2
292296	0	0.2
294296	0	0.4
296296	2	0.4
288298	1	0.0625
290298	1	0.75
292298	0	0.125
294298	0	0.25
296298	0	0.5
298298	0	0.15625
288300	0	0.0375
290300	1	0.45
292300	0	0.075
294300	1	0.15
296300	0	0.3
298300	0	0.1875
300300	0	0.05625
288302	0	0.0125
290302	1	0.15
292302	0	0.025
294302	0	0.05
296302	0	0.1
298302	0	0.0625
300302	0	0.0375
302302	0	0.00625
288304	0	0.0625
290304	0	0.75
292304	0	0.125
294304	1	0.25
296304	0	0.5
298304	1	0.3125
300304	0	0.1875
302304	0	0.0625
304304	0	0.15625
288306	0	0.0375
290306	1	0.45
292306	0	0.075
294306	1	0.15
296306	0	0.3
298306	0	0.1875
300306	0	0.1125
302306	0	0.0375
304306	1	0.1875
306306	0	0.05625
288308	0	0.075
290308	1	0.9
292308	1	0.15
294308	0	0.3
296308	0	0.6
298308	0	0.375
300308	0	0.225
302308	0	0.075
304308	0	0.375
306308	0	0.225
308308	0	0.225
288310	0	0.025
290310	1	0.3
292310	0	0.05
294310	0	0.1
296310	0	0.2
298310	0	0.125
300310	0	0.075
302310	0	0.025
304310	0	0.125
306310	0	0.075
308310	0	0.15
310310	0	0.025
288314	0	0.0375
290314	0	0.45
292314	0	0.075
294314	0	0.15
296314	1	0.3
298314	0	0.1875
300314	1	0.1125
302314	0	0.0375
304314	0	0.1875
306314	0	0.1125
308314	1	0.225
310314	0	0.075
314314	0	0.05625
288316	0	0.05
290316	1	0.6
292316	0	0.1
294316	0	0.2
296316	0	0.4
298316	0	0.25
300316	0	0.15
302316	0	0.05
304316	2	0.25
306316	0	0.15
308316	0	0.3
310316	0	0.1
314316	0	0.15
316316	0	0.1
288318	0	0.025
290318	0	0.3
292318	0	0.05
294318	0	0.1
296318	0	0.2
298318	0	0.125
300318	0	0.075
302318	0	0.025
304318	0	0.125
306318	0	0.075
308318	1	0.15
310318	0	0.05
314318	0	0.075
316318	0	0.1
318318	0	0.025
288320	0	0.0375
290320	1	0.45
292320	0	0.075
294320	0	0.15
296320	1	0.3
298320	0	0.1875
300320	0	0.1125
302320	0	0.0375
304320	0	0.1875
306320	0	0.1125
308320	0	0.225
310320	0	0.075
314320	0	0.1125
316320	0	0.15
318320	0	0.075
320320	0	0.05625
288334	0	0.0375
290334	1	0.45
292334	0	0.075
294334	0	0.15
296334	0	0.3
298334	1	0.1875
300334	0	0.1125
302334	0	0.0375
304334	0	0.1875
306334	0	0.1125
308334	1	0.225
310334	0	0.075
314334	0	0.1125
316334	0	0.15
318334	0	0.075
320334	0	0.1125
334334	0	0.05625
288338	0	0.0375
290338	0	0.45
292338	0	0.075
294338	1	0.15
296338	0	0.3
298338	0	0.1875
300338	0	0.1125
302338	0	0.0375
304338	0	0.1875
306338	0	0.1125
308338	0	0.225
310338	0	0.075
314338	0	0.1125
316338	0	0.15
318338	0	0.075
320338	1	0.1125
334338	0	0.1125
338338	0	0.05625
288358	0	0.0125
290358	0	0.15
292358	0	0.025
294358	0	0.05
296358	0	0.1
298358	0	0.0625
300358	0	0.0375
302358	0	0.0125
304358	0	0.0625
306358	0	0.0375
308358	1	0.075
310358	0	0.025
314358	0	0.0375
316358	0	0.05
318358	0	0.025
320358	0	0.0375
334358	0	0.0375
338358	0	0.0375
358358	0	0.00625
288468	0	0.1
290468	2	1.2
292468	1	0.2
294468	0	0.4
296468	1	0.8
298468	1	0.5
300468	0	0.3
302468	0	0.1
304468	0	0.5
306468	0	0.3
308468	0	0.6
310468	1	0.2
314468	0	0.3
316468	1	0.4
318468	1	0.2
320468	0	0.3
334468	0	0.3
338468	0	0.3
358468	0	0.1
468468	0	0.4
288470	0	0.0125
290470	0	0.15
292470	0	0.025
294470	0	0.05
296470	0	0.1
298470	0	0.0625
300470	0	0.0375
302470	0	0.0125
304470	0	0.0625
306470	0	0.0375
308470	0	0.075
310470	0	0.025
314470	0	0.0375
316470	0	0.05
318470	0	0.025
320470	0	0.0375
334470	0	0.0375
338470	1	0.0375
358470	0	0.0125
468470	0	0.1
470470	0	0.00625
ChiSquare	174.45
DF	210
Prob	0.964891	ns
Pop	Gal11
Locus	A113-1
Summary
Genotype	#Observed	#Expected
221221	0	0.097561
221225	0	0.439024
225225	1	0.493902
221229	1	0.878049
225229	1	1.97561
229229	1	1.97561
221231	1	0.439024
225231	0	0.987805
229231	1	1.97561
231231	1	0.493902
221233	1	1.65854
225233	5	3.73171
229233	10	7.46341
231233	5	3.73171
233233	5	7.04878
221235	1	0.390244
225235	1	0.878049
229235	3	1.7561
231235	0	0.878049
233235	3	3.31707
235235	0	0.390244
ChiSquare	10.4712
DF	15
Prob	0.789099	ns
Pop	Gal11
Locus	A117-1
Summary
Genotype	#Observed	#Expected
233233	0	0.025
233237	0	0.175
237237	0	0.30625
233239	1	0.3
237239	2	1.05
239239	1	0.9
233241	0	0.1
237241	0	0.35
239241	0	0.6
241241	0	0.1
233243	1	0.325
237243	3	1.1375
239243	1	1.95
241243	1	0.65
243243	0	1.05625
233245	0	0.4
237245	0	1.4
239245	3	2.4
241245	0	0.8
243245	5	2.6
245245	1	1.6
233247	0	0.1
237247	0	0.35
239247	1	0.6
241247	0	0.2
243247	0	0.65
245247	0	0.8
247247	0	0.1
233249	0	0.075
237249	0	0.2625
239249	0	0.45
241249	1	0.15
243249	0	0.4875
245249	0	0.6
247249	2	0.15
249249	0	0.05625
233251	0	0.1
237251	0	0.35
239251	1	0.6
241251	0	0.2
243251	0	0.65
245251	1	0.8
247251	0	0.2
249251	0	0.15
251251	1	0.1
233257	0	0.025
237257	0	0.0875
239257	1	0.15
241257	0	0.05
243257	0	0.1625
245257	0	0.2
247257	0	0.05
249257	0	0.0375
251257	0	0.05
257257	0	0.00625
233259	0	0.025
237259	0	0.0875
239259	0	0.15
241259	0	0.05
243259	1	0.1625
245259	0	0.2
247259	0	0.05
249259	0	0.0375
251259	0	0.05
257259	0	0.0125
259259	0	0.00625
233261	0	0.025
237261	0	0.0875
239261	0	0.15
241261	0	0.05
243261	0	0.1625
245261	1	0.2
247261	0	0.05
249261	0	0.0375
251261	0	0.05
257261	0	0.0125
259261	0	0.0125
261261	0	0.00625
233271	0	0.225
237271	2	0.7875
239271	0	1.35
241271	0	0.45
243271	1	1.4625
245271	3	1.8
247271	1	0.45
249271	0	0.3375
251271	0	0.45
257271	0	0.1125
259271	0	0.1125
261271	0	0.1125
271271	1	0.50625
233273	0	0.075
237273	0	0.2625
239273	0	0.45
241273	2	0.15
243273	0	0.4875
245273	1	0.6
247273	0	0.15
249273	0	0.1125
251273	0	0.15
257273	0	0.0375
259273	0	0.0375
261273	0	0.0375
271273	0	0.3375
273273	0	0.05625
ChiSquare	104.316
DF	91
Prob	0.160723	ns
Pop	Gal11
Locus	B101-1
Summary
Genotype	#Observed	#Expected
145145	4	2.95122
145149	4	2.14634
149149	1	0.390244
145151	0	2.95122
149151	0	1.07317
151151	2	0.737805
145155	1	0.268293
149155	0	0.097561
151155	0	0.134146
155155	0	0.00609756
145157	2	2.14634
149157	0	0.780488
151157	4	1.07317
155157	0	0.097561
157157	0	0.390244
145159	1	1.60976
149159	0	0.585366
151159	1	0.804878
155159	0	0.0731707
157159	0	0.585366
159159	1	0.219512
145163	1	0.536585
149163	0	0.195122
151163	0	0.268293
155163	0	0.0243902
157163	0	0.195122
159163	0	0.146341
163163	0	0.0243902
145167	2	1.60976
149167	0	0.585366
151167	0	0.804878
155167	0	0.0731707
157167	1	0.585366
159167	0	0.439024
163167	0	0.146341
167167	1	0.219512
145169	1	2.68293
149169	2	0.97561
151169	1	1.34146
155169	0	0.121951
157169	1	0.97561
159169	0	0.731707
163169	0	0.243902
167169	0	0.731707
169169	2	0.609756
145171	0	0.268293
149171	0	0.097561
151171	0	0.134146
155171	0	0.0121951
157171	0	0.097561
159171	0	0.0731707
163171	1	0.0243902
167171	0	0.0731707
169171	0	0.121951
171171	0	0.00609756
145173	1	0.536585
149173	0	0.195122
151173	0	0.268293
155173	0	0.0243902
157173	0	0.195122
159173	1	0.146341
163173	0	0.0487805
167173	0	0.146341
169173	0	0.243902
171173	0	0.0243902
173173	0	0.0243902
145175	1	1.34146
149175	0	0.487805
151175	1	0.670732
155175	0	0.0609756
157175	0	0.487805
159175	1	0.365854
163175	0	0.121951
167175	1	0.365854
169175	1	0.609756
171175	0	0.0609756
173175	0	0.121951
175175	0	0.152439
ChiSquare	89.2348
DF	66
Prob	0.0299967	*
Pop	Gal11
Locus	B103-1
Summary
Genotype	#Observed	#Expected
180180	1	2.43902
180182	4	3.65854
182182	2	1.37195
180184	2	3.17073
182184	2	2.37805
184184	0	1.03049
180186	0	0.731707
182186	1	0.54878
184186	1	0.47561
186186	0	0.054878
180188	6	3.41463
182188	1	2.56098
184188	6	2.21951
186188	0	0.512195
188188	0	1.19512
180190	3	1.95122
182190	1	1.46341
184190	1	1.26829
186190	0	0.292683
188190	1	1.36585
190190	0	0.390244
180192	2	1.21951
182192	1	0.914634
184192	1	0.792683
186192	0	0.182927
188192	0	0.853659
190192	1	0.487805
192192	0	0.152439
180194	1	0.731707
182194	1	0.54878
184194	0	0.47561
186194	0	0.109756
188194	0	0.512195
190194	1	0.292683
192194	0	0.182927
194194	0	0.054878
180196	0	0.243902
182196	0	0.182927
184196	0	0.158537
186196	1	0.0365854
188196	0	0.170732
190196	0	0.097561
192196	0	0.0609756
194196	0	0.0365854
196196	0	0.00609756
ChiSquare	49.1606
DF	36
Prob	0.0706757	ns
Pop	Gal11
Locus	B108-1
Summary
Genotype	#Observed	#Expected
174174	5	1.08333
174178	0	1.5
178178	3	0.519231
174180	0	3.5
178180	0	2.42308
180180	10	2.82692
174182	1	3.33333
178182	3	2.30769
180182	1	5.38462
182182	6	2.5641
174184	2	2.5
178184	0	1.73077
180184	0	4.03846
182184	3	3.84615
184184	5	1.44231
ChiSquare	76.4835
DF	10
Prob	2.44545e-12	***
Pop	Gal11
Locus	B121-1
Summary
Genotype	#Observed	#Expected
275275	3	0.9
275277	0	1.5
277277	3	0.625
275279	0	1.5
277279	0	1.25
279279	1	0.625
275281	6	7.2
277281	4	6
279281	8	6
281281	15	14.4
ChiSquare	19.9583
DF	6
Prob	0.00281708	**
Pop	Gal11
Locus	B6-1
Summary
Genotype	#Observed	#Expected
267267	1	1.225
267269	0	1.05
269269	1	0.225
267271	0	0.525
269271	0	0.225
271271	0	0.05625
267273	6	2.975
269273	1	1.275
271273	0	0.6375
273273	2	1.80625
267275	1	1.575
269275	0	0.675
271275	2	0.3375
273275	1	1.9125
275275	2	0.50625
267277	5	5.25
269277	3	2.25
271277	1	1.125
273277	5	6.375
275277	1	3.375
277277	7	5.625
267279	0	0.175
269279	0	0.075
271279	0	0.0375
273279	0	0.2125
275279	0	0.1125
277279	1	0.375
279279	0	0.00625
ChiSquare	26.5178
DF	21
Prob	0.18739	ns
Summary by locus for Gal11
Locus	ChiSquare	DF	Prob
A106-1	174.45	210	0.964891	ns
A113-1	10.4712	15	0.789099	ns
A117-1	104.316	91	0.160723	ns
B101-1	89.2348	66	0.0299967	*
B103-1	49.1606	36	0.0706757	ns
B108-1	76.4835	10	2.44545e-12	***
B121-1	19.9583	6	0.00281708	**
B6-1	26.5178	21	0.18739	ns
Pop	Mand03
Locus	A106-1
Summary
Genotype	#Observed	#Expected
290290	0	0.644737
290294	0	0.184211
294294	0	0.0131579
290296	1	0.368421
294296	0	0.0526316
296296	0	0.0526316
290298	2	0.552632
294298	0	0.0789474
296298	0	0.157895
298298	0	0.118421
290300	1	0.368421
294300	1	0.0526316
296300	0	0.105263
298300	0	0.157895
300300	0	0.0526316
290302	0	0.368421
294302	0	0.0526316
296302	0	0.105263
298302	0	0.157895
300302	0	0.105263
302302	0	0.0526316
290304	1	0.921053
294304	0	0.131579
296304	0	0.263158
298304	0	0.394737
300304	0	0.263158
302304	0	0.263158
304304	0	0.328947
290306	0	0.552632
294306	0	0.0789474
296306	0	0.157895
298306	0	0.236842
300306	0	0.157895
302306	1	0.157895
304306	0	0.394737
306306	1	0.118421
290308	0	0.552632
294308	0	0.0789474
296308	0	0.157895
298308	1	0.236842
300308	0	0.157895
302308	1	0.157895
304308	0	0.394737
306308	0	0.236842
308308	0	0.118421
290310	1	0.552632
294310	0	0.0789474
296310	0	0.157895
298310	0	0.236842
300310	0	0.157895
302310	0	0.157895
304310	1	0.394737
306310	0	0.236842
308310	0	0.236842
310310	0	0.118421
290312	0	0.184211
294312	0	0.0263158
296312	0	0.0526316
298312	0	0.0789474
300312	0	0.0526316
302312	0	0.0526316
304312	0	0.131579
306312	0	0.0789474
308312	0	0.0789474
310312	1	0.0789474
312312	0	0.0131579
290314	0	0.184211
294314	0	0.0263158
296314	0	0.0526316
298314	0	0.0789474
300314	0	0.0526316
302314	0	0.0526316
304314	0	0.131579
306314	0	0.0789474
308314	1	0.0789474
310314	0	0.0789474
312314	0	0.0263158
314314	0	0.0131579
290316	1	0.552632
294316	0	0.0789474
296316	0	0.157895
298316	0	0.236842
300316	0	0.157895
302316	0	0.157895
304316	2	0.394737
306316	0	0.236842
308316	0	0.236842
310316	0	0.236842
312316	0	0.0789474
314316	0	0.0789474
316316	0	0.118421
290334	0	0.184211
294334	0	0.0263158
296334	1	0.0526316
298334	0	0.0789474
300334	0	0.0526316
302334	0	0.0526316
304334	0	0.131579
306334	0	0.0789474
308334	0	0.0789474
310334	0	0.0789474
312334	0	0.0263158
314334	0	0.0263158
316334	0	0.0789474
334334	0	0.0131579
290468	0	0.184211
294468	0	0.0263158
296468	0	0.0526316
298468	0	0.0789474
300468	0	0.0526316
302468	0	0.0526316
304468	1	0.131579
306468	0	0.0789474
308468	0	0.0789474
310468	0	0.0789474
312468	0	0.0263158
314468	0	0.0263158
316468	0	0.0789474
334468	0	0.0263158
468468	0	0.0131579
ChiSquare	107.305
DF	105
Prob	0.419241	ns
Pop	Mand03
Locus	A113-1
Summary
Genotype	#Observed	#Expected
225225	0	0.3125
225229	3	0.625
229229	0	0.3125
225231	1	0.875
229231	0	0.875
231231	0	0.6125
225233	1	1.625
229233	0	1.625
231233	2	2.275
233233	3	2.1125
225235	0	1.125
229235	2	1.125
231235	3	1.575
233235	4	2.925
235235	0	1.0125
225237	0	0.125
229237	0	0.125
231237	1	0.175
233237	0	0.325
235237	0	0.225
237237	0	0.0125
ChiSquare	22.6311
DF	15
Prob	0.0922937	ns
Pop	Mand03
Locus	A117-1
Summary
Genotype	#Observed	#Expected
237237	0	0.680556
237239	0	0.388889
239239	0	0.0555556
237241	1	0.583333
239241	0	0.166667
241241	0	0.125
237243	1	0.583333
239243	0	0.166667
241243	0	0.25
243243	0	0.125
237245	2	1.36111
239245	0	0.388889
241245	2	0.583333
243245	0	0.583333
245245	0	0.680556
237247	1	0.388889
239247	1	0.111111
241247	0	0.166667
243247	0	0.166667
245247	0	0.388889
247247	0	0.0555556
237249	0	0.194444
239249	0	0.0555556
241249	0	0.0833333
243249	1	0.0833333
245249	0	0.194444
247249	0	0.0555556
249249	0	0.0138889
237251	0	0.388889
239251	0	0.111111
241251	0	0.166667
243251	0	0.166667
245251	0	0.388889
247251	0	0.111111
249251	0	0.0555556
251251	1	0.0555556
237257	0	0.194444
239257	0	0.0555556
241257	0	0.0833333
243257	0	0.0833333
245257	1	0.194444
247257	0	0.0555556
249257	0	0.0277778
251257	0	0.0555556
257257	0	0.0138889
237271	1	0.194444
239271	0	0.0555556
241271	0	0.0833333
243271	0	0.0833333
245271	0	0.194444
247271	0	0.0555556
249271	0	0.0277778
251271	0	0.0555556
257271	0	0.0277778
271271	0	0.0138889
237273	1	1.36111
239273	1	0.388889
241273	0	0.583333
243273	1	0.583333
245273	2	1.36111
247273	0	0.388889
249273	0	0.194444
251273	0	0.388889
257273	0	0.194444
271273	0	0.194444
273273	1	0.680556
ChiSquare	56.5102
DF	55
Prob	0.418329	ns
Pop	Mand03
Locus	B101-1
Summary
Genotype	#Observed	#Expected
145145	3	3.6125
145151	4	2.125
151151	0	0.3125
145157	2	2.55
151157	0	0.75
157157	1	0.45
145159	0	0.425
151159	0	0.125
157159	0	0.15
159159	0	0.0125
145163	0	0.425
151163	0	0.125
157163	0	0.15
159163	0	0.025
163163	0	0.0125
145169	3	2.125
151169	0	0.625
157169	1	0.75
159169	0	0.125
163169	1	0.125
169169	0	0.3125
145171	1	1.275
151171	0	0.375
157171	1	0.45
159171	1	0.075
163171	0	0.075
169171	0	0.375
171171	0	0.1125
145177	1	0.85
151177	1	0.25
157177	0	0.3
159177	0	0.05
163177	0	0.05
169177	0	0.25
171177	0	0.15
177177	0	0.05
ChiSquare	28.8966
DF	28
Prob	0.417788	ns
Pop	Mand03
Locus	B103-1
Summary
Genotype	#Observed	#Expected
180180	2	2.45
180182	1	1.05
182182	0	0.1125
180184	2	2.8
182184	1	0.6
184184	0	0.8
180186	3	2.1
182186	0	0.45
184186	1	1.2
186186	1	0.45
180188	1	1.4
182188	0	0.3
184188	3	0.8
186188	0	0.6
188188	0	0.2
180192	2	0.7
182192	0	0.15
184192	0	0.4
186192	0	0.3
188192	0	0.2
192192	0	0.05
180194	1	1.05
182194	1	0.225
184194	1	0.6
186194	0	0.45
188194	0	0.3
192194	0	0.15
194194	0	0.1125
ChiSquare	17.7636
DF	21
Prob	0.663911	ns
Pop	Mand03
Locus	B108-1
Summary
Genotype	#Observed	#Expected
174174	0	0.0147059
174180	0	0.0588235
180180	1	0.0588235
174182	0	0.529412
180182	0	1.05882
182182	9	4.76471
174184	1	0.382353
180184	0	0.764706
182184	0	6.88235
184184	6	2.48529
ChiSquare	34.1006
DF	6
Prob	6.4331e-06	***
Pop	Mand03
Locus	B121-1
Summary
Genotype	#Observed	#Expected
275275	0	0.05
275277	0	0.1
277277	0	0.05
275279	0	0.4
277279	0	0.4
279279	1	0.8
275281	2	1.4
277281	2	1.4
279281	6	5.6
281281	9	9.8
ChiSquare	1.65816
DF	6
Prob	0.948305	ns
Pop	Mand03
Locus	B6-1
Summary
Genotype	#Observed	#Expected
267267	1	0.644737
267271	0	0.921053
271271	1	0.328947
267273	2	2.02632
271273	3	1.44737
273273	1	1.59211
267275	0	0.552632
271275	0	0.394737
273275	0	0.868421
275275	1	0.118421
267277	3	2.21053
271277	0	1.57895
273277	4	3.47368
275277	1	0.947368
277277	2	1.89474
ChiSquare	14.6999
DF	10
Prob	0.143391	ns
Summary by locus for Mand03
Locus	ChiSquare	DF	Prob
A106-1	107.305	105	0.419241	ns
A113-1	22.6311	15	0.0922937	ns
A117-1	56.5102	55	0.418329	ns
B101-1	28.8966	28	0.417788	ns
B103-1	17.7636	21	0.663911	ns
B108-1	34.1006	6	6.4331e-06	***
B121-1	1.65816	6	0.948305	ns
B6-1	14.6999	10	0.143391	ns
Pop	Mand11
Locus	A106-1
Summary
Genotype	#Observed	#Expected
272272	0	0.00806452
272290	0	0.0645161
290290	0	0.129032
272292	0	0.016129
290292	0	0.0645161
292292	0	0.00806452
272296	0	0.016129
290296	0	0.0645161
292296	0	0.016129
296296	0	0.00806452
272298	0	0.112903
290298	1	0.451613
292298	0	0.112903
296298	0	0.112903
298298	1	0.395161
272300	0	0.0806452
290300	1	0.322581
292300	1	0.0806452
296300	0	0.0806452
298300	1	0.564516
300300	0	0.201613
272302	0	0.016129
290302	0	0.0645161
292302	0	0.016129
296302	0	0.016129
298302	0	0.112903
300302	0	0.0806452
302302	0	0.00806452
272304	0	0.0483871
290304	0	0.193548
292304	0	0.0483871
296304	0	0.0483871
298304	0	0.33871
300304	0	0.241935
302304	0	0.0483871
304304	0	0.0725806
272306	0	0.145161
290306	0	0.580645
292306	0	0.145161
296306	0	0.145161
298306	0	1.01613
300306	0	0.725806
302306	0	0.145161
304306	0	0.435484
306306	2	0.653226
272308	0	0.016129
290308	0	0.0645161
292308	0	0.016129
296308	0	0.016129
298308	0	0.112903
300308	1	0.0806452
302308	0	0.016129
304308	0	0.0483871
306308	0	0.145161
308308	0	0.00806452
272310	0	0.016129
290310	0	0.0645161
292310	0	0.016129
296310	0	0.016129
298310	0	0.112903
300310	0	0.0806452
302310	0	0.016129
304310	0	0.0483871
306310	0	0.145161
308310	0	0.016129
310310	0	0.00806452
272312	1	0.112903
290312	1	0.451613
292312	0	0.112903
296312	0	0.112903
298312	1	0.790323
300312	0	0.564516
302312	0	0.112903
304312	0	0.33871
306312	1	1.01613
308312	0	0.112903
310312	0	0.112903
312312	1	0.395161
272314	0	0.0483871
290314	1	0.193548
292314	0	0.0483871
296314	0	0.0483871
298314	0	0.33871
300314	1	0.241935
302314	0	0.0483871
304314	0	0.145161
306314	0	0.435484
308314	0	0.0483871
310314	0	0.0483871
312314	0	0.33871
314314	0	0.0725806
272316	0	0.0645161
290316	0	0.258065
292316	0	0.0645161
296316	0	0.0645161
298316	0	0.451613
300316	0	0.322581
302316	0	0.0645161
304316	1	0.193548
306316	1	0.580645
308316	0	0.0645161
310316	0	0.0645161
312316	0	0.451613
314316	0	0.193548
316316	0	0.129032
272320	0	0.0322581
290320	0	0.129032
292320	0	0.0322581
296320	0	0.0322581
298320	0	0.225806
300320	0	0.16129
302320	0	0.0322581
304320	0	0.0967742
306320	0	0.290323
308320	0	0.0322581
310320	1	0.0322581
312320	0	0.225806
314320	1	0.0967742
316320	0	0.129032
320320	0	0.0322581
272334	0	0.0483871
290334	0	0.193548
292334	0	0.0483871
296334	0	0.0483871
298334	1	0.33871
300334	0	0.241935
302334	1	0.0483871
304334	0	0.145161
306334	0	0.435484
308334	0	0.0483871
310334	0	0.0483871
312334	0	0.33871
314334	0	0.145161
316334	1	0.193548
320334	0	0.0967742
334334	0	0.0725806
272338	0	0.0322581
290338	0	0.129032
292338	0	0.0322581
296338	0	0.0322581
298338	0	0.225806
300338	0	0.16129
302338	0	0.0322581
304338	0	0.0967742
306338	1	0.290323
308338	0	0.0322581
310338	0	0.0322581
312338	1	0.225806
314338	0	0.0967742
316338	0	0.129032
320338	0	0.0645161
334338	0	0.0967742
338338	0	0.0322581
272468	0	0.112903
290468	0	0.451613
292468	0	0.112903
296468	1	0.112903
298468	1	0.790323
300468	0	0.564516
302468	0	0.112903
304468	2	0.33871
306468	2	1.01613
308468	0	0.112903
310468	0	0.112903
312468	0	0.790323
314468	0	0.33871
316468	1	0.451613
320468	0	0.225806
334468	0	0.33871
338468	0	0.225806
468468	0	0.395161
ChiSquare	147.655
DF	153
Prob	0.606786	ns
Pop	Mand11
Locus	A113-1
Summary
Genotype	#Observed	#Expected
221221	0	0.0725806
221225	0	0.241935
225225	0	0.201613
221229	1	1.01613
225229	4	1.69355
229229	3	3.55645
221231	0	0.0967742
225231	0	0.16129
229231	0	0.677419
231231	0	0.0322581
221233	1	1.16129
225233	0	1.93548
229233	8	8.12903
231233	2	0.774194
233233	5	4.64516
221235	0	0.290323
225235	1	0.483871
229235	2	2.03226
231235	0	0.193548
233235	3	2.32258
235235	0	0.290323
221237	1	0.0483871
225237	0	0.0806452
229237	0	0.33871
231237	0	0.0322581
233237	0	0.387097
235237	0	0.0967742
237237	0	0.00806452
ChiSquare	29.8217
DF	21
Prob	0.0956302	ns
Pop	Mand11
Locus	A117-1
Summary
Genotype	#Observed	#Expected
233233	0	0.00806452
233235	0	0.016129
235235	0	0.00806452
233237	0	0.16129
235237	1	0.16129
237237	0	0.806452
233239	1	0.225806
235239	0	0.225806
237239	2	2.25806
239239	2	1.58065
233241	0	0.0322581
235241	0	0.0322581
237241	0	0.322581
239241	0	0.451613
241241	0	0.0322581
233243	0	0.0806452
235243	0	0.0806452
237243	0	0.806452
239243	3	1.12903
241243	0	0.16129
243243	0	0.201613
233245	0	0.0806452
235245	0	0.0806452
237245	3	0.806452
239245	0	1.12903
241245	0	0.16129
243245	0	0.403226
245245	1	0.201613
233247	0	0.0967742
235247	0	0.0967742
237247	0	0.967742
239247	2	1.35484
241247	0	0.193548
243247	0	0.483871
245247	0	0.483871
247247	0	0.290323
233249	0	0.016129
235249	0	0.016129
237249	0	0.16129
239249	0	0.225806
241249	0	0.0322581
243249	0	0.0806452
245249	0	0.0806452
247249	0	0.0967742
249249	0	0.00806452
233251	0	0.0322581
235251	0	0.0322581
237251	0	0.322581
239251	0	0.451613
241251	0	0.0645161
243251	0	0.16129
245251	0	0.16129
247251	0	0.193548
249251	1	0.0322581
251251	0	0.0322581
233255	0	0.016129
235255	0	0.016129
237255	0	0.16129
239255	0	0.225806
241255	0	0.0322581
243255	0	0.0806452
245255	0	0.0806452
247255	1	0.0967742
249255	0	0.016129
251255	0	0.0322581
255255	0	0.00806452
233257	0	0.0322581
235257	0	0.0322581
237257	1	0.322581
239257	0	0.451613
241257	0	0.0645161
243257	0	0.16129
245257	0	0.16129
247257	0	0.193548
249257	0	0.0322581
251257	1	0.0645161
255257	0	0.0322581
257257	0	0.0322581
233271	0	0.112903
235271	0	0.112903
237271	1	1.12903
239271	1	1.58065
241271	2	0.225806
243271	1	0.564516
245271	0	0.564516
247271	2	0.677419
249271	0	0.112903
251271	0	0.225806
255271	0	0.112903
257271	0	0.225806
271271	0	0.395161
233273	0	0.0806452
235273	0	0.0806452
237273	2	0.806452
239273	1	1.12903
241273	0	0.16129
243273	1	0.403226
245273	0	0.403226
247273	1	0.483871
249273	0	0.0806452
251273	0	0.16129
255273	0	0.0806452
257273	0	0.16129
271273	0	0.564516
273273	0	0.201613
ChiSquare	108.209
DF	91
Prob	0.105328	ns
Pop	Mand11
Locus	B101-1
Summary
Genotype	#Observed	#Expected
145145	3	2.06452
145151	2	1.29032
151151	0	0.201613
145155	2	0.774194
151155	0	0.241935
155155	0	0.0725806
145157	4	3.35484
151157	1	1.04839
155157	0	0.629032
157157	1	1.3629
145159	1	0.774194
151159	0	0.241935
155159	0	0.145161
157159	0	0.629032
159159	0	0.0725806
145163	0	0.774194
151163	0	0.241935
155163	1	0.145161
157163	1	0.629032
159163	0	0.145161
163163	0	0.0725806
145167	0	0.258065
151167	0	0.0806452
155167	0	0.0483871
157167	1	0.209677
159167	0	0.0483871
163167	0	0.0483871
167167	0	0.00806452
145169	1	4.3871
151169	2	1.37097
155169	0	0.822581
157169	4	3.56452
159169	2	0.822581
163169	1	0.822581
167169	0	0.274194
169169	3	2.33065
145175	0	0.258065
151175	0	0.0806452
155175	0	0.0483871
157175	0	0.209677
159175	0	0.0483871
163175	0	0.0483871
167175	0	0.016129
169175	1	0.274194
175175	0	0.00806452
ChiSquare	23.8437
DF	36
Prob	0.93998	ns
Pop	Mand11
Locus	B103-1
Summary
Genotype	#Observed	#Expected
180180	4	4.64516
180182	0	1.93548
182182	2	0.201613
180184	8	5.03226
182184	0	1.04839
184184	1	1.3629
180186	2	1.16129
182186	0	0.241935
184186	0	0.629032
186186	0	0.0725806
180188	2	3.09677
182188	0	0.645161
184188	2	1.67742
186188	0	0.387097
188188	2	0.516129
180190	4	2.70968
182190	0	0.564516
184190	1	1.46774
186190	0	0.33871
188190	0	0.903226
190190	1	0.395161
180192	0	0.387097
182192	1	0.0806452
184192	0	0.209677
186192	0	0.0483871
188192	0	0.129032
190192	0	0.112903
192192	0	0.00806452
180194	0	0.387097
182194	0	0.0806452
184194	0	0.209677
186194	1	0.0483871
188194	0	0.129032
190194	0	0.112903
192194	0	0.016129
194194	0	0.00806452
ChiSquare	62.7902
DF	28
Prob	0.000177117	***
Pop	Mand11
Locus	B108-1
Summary
Genotype	#Observed	#Expected
174174	1	0.395161
174176	0	0.33871
176176	1	0.0725806
174180	1	1.12903
176180	0	0.483871
180180	4	0.806452
174182	2	3.3871
176182	1	1.45161
180182	1	4.83871
182182	13	7.25806
174184	2	1.12903
176184	0	0.483871
180184	0	1.6129
182184	0	4.83871
184184	4	0.806452
174186	0	0.225806
176186	0	0.0967742
180186	0	0.322581
182186	0	0.967742
184186	0	0.322581
186186	1	0.0322581
ChiSquare	85.7779
DF	15
Prob	6.04017e-12	***
Pop	Mand11
Locus	B121-1
Summary
Genotype	#Observed	#Expected
275275	1	0.3
275277	0	0.4
277277	1	0.133333
275279	0	0.3
277279	0	0.2
279279	0	0.075
275281	4	4.7
277281	2	3.13333
279281	3	2.35
281281	19	18.4083
ChiSquare	8.95466
DF	6
Prob	0.176144	ns
Pop	Mand11
Locus	B6-1
Summary
Genotype	#Observed	#Expected
267267	1	0.653226
267269	1	0.290323
269269	0	0.0322581
267271	0	0.580645
269271	0	0.129032
271271	0	0.129032
267273	2	2.75806
269273	1	0.612903
271273	2	1.22581
273273	4	2.91129
267275	1	0.435484
269275	0	0.0967742
271275	0	0.193548
273275	0	0.919355
275275	0	0.0725806
267277	3	3.48387
269277	0	0.774194
271277	1	1.54839
273277	6	7.35484
275277	2	1.16129
277277	6	4.64516
267279	0	0.145161
269279	0	0.0322581
271279	1	0.0645161
273279	0	0.306452
275279	0	0.0483871
277279	0	0.387097
279279	0	0.00806452
ChiSquare	22.9308
DF	21
Prob	0.347678	ns
Summary by locus for Mand11
Locus	ChiSquare	DF	Prob
A106-1	147.655	153	0.606786	ns
A113-1	29.8217	21	0.0956302	ns
A117-1	108.209	91	0.105328	ns
B101-1	23.8437	36	0.93998	ns
B103-1	62.7902	28	0.000177117	***
B108-1	85.7779	15	6.04017e-12	***
B121-1	8.95466	6	0.176144	ns
B6-1	22.9308	21	0.347678	ns
Pop	Pend03
Locus	A106-1
Summary
Genotype	#Observed	#Expected
290290	1	0.720588
290294	0	0.205882
294294	0	0.0147059
290296	1	0.205882
294296	0	0.0294118
296296	0	0.0147059
290298	0	1.02941
294298	0	0.147059
296298	0	0.147059
298298	0	0.367647
290300	1	0.617647
294300	0	0.0882353
296300	0	0.0882353
298300	2	0.441176
300300	0	0.132353
290302	0	0.205882
294302	0	0.0294118
296302	0	0.0294118
298302	1	0.147059
300302	0	0.0882353
302302	0	0.0147059
290304	1	0.205882
294304	0	0.0294118
296304	0	0.0294118
298304	0	0.147059
300304	0	0.0882353
302304	0	0.0294118
304304	0	0.0147059
290306	0	0.205882
294306	0	0.0294118
296306	0	0.0294118
298306	1	0.147059
300306	0	0.0882353
302306	0	0.0294118
304306	0	0.0294118
306306	0	0.0147059
290308	0	0.205882
294308	0	0.0294118
296308	0	0.0294118
298308	0	0.147059
300308	0	0.0882353
302308	0	0.0294118
304308	0	0.0294118
306308	0	0.0294118
308308	0	0.0147059
290310	0	0.205882
294310	0	0.0294118
296310	0	0.0294118
298310	0	0.147059
300310	0	0.0882353
302310	0	0.0294118
304310	0	0.0294118
306310	0	0.0294118
308310	1	0.0294118
310310	0	0.0147059
290318	0	0.205882
294318	0	0.0294118
296318	0	0.0294118
298318	0	0.147059
300318	0	0.0882353
302318	0	0.0294118
304318	0	0.0294118
306318	0	0.0294118
308318	0	0.0294118
310318	0	0.0294118
318318	0	0.0147059
290332	0	0.411765
294332	0	0.0588235
296332	0	0.0588235
298332	0	0.294118
300332	0	0.176471
302332	0	0.0588235
304332	0	0.0588235
306332	0	0.0588235
308332	0	0.0588235
310332	0	0.0588235
318332	0	0.0588235
332332	1	0.0588235
290334	1	0.411765
294334	0	0.0588235
296334	0	0.0588235
298334	0	0.294118
300334	0	0.176471
302334	0	0.0588235
304334	0	0.0588235
[truncated: 2,378 more rows]

## Sheet: HWS
Summary of Chi-Square Tests for Hardy-Weinberg Equilibrium
Data Sheet	Sheet1
Data Title
No. Loci	8
No. Samples	248
No. Pops.	10
Pop	Locus	DF	ChiSq	Prob	Signif
Gal03	A106-1	171	187.944	0.177901	ns
Gal03	A113-1	21	17.2222	0.69755	ns
Gal03	A117-1	36	34.7748	0.526775	ns
Gal03	B101-1	21	14.4024	0.8517	ns
Gal03	B103-1	15	9.94429	0.82323	ns
Gal03	B108-1	10	24.7245	0.00589292	**
Gal03	B121-1	6	5.48	0.483877	ns
Gal03	B6-1	15	19.5086	0.191603	ns
Gal11	A106-1	210	174.45	0.964891	ns
Gal11	A113-1	15	10.4712	0.789099	ns
Gal11	A117-1	91	104.316	0.160723	ns
Gal11	B101-1	66	89.2348	0.0299967	*
Gal11	B103-1	36	49.1606	0.0706757	ns
Gal11	B108-1	10	76.4835	2.44545e-12	***
Gal11	B121-1	6	19.9583	0.00281708	**
Gal11	B6-1	21	26.5178	0.18739	ns
Mand03	A106-1	105	107.305	0.419241	ns
Mand03	A113-1	15	22.6311	0.0922937	ns
Mand03	A117-1	55	56.5102	0.418329	ns
Mand03	B101-1	28	28.8966	0.417788	ns
Mand03	B103-1	21	17.7636	0.663911	ns
Mand03	B108-1	6	34.1006	6.4331e-06	***
Mand03	B121-1	6	1.65816	0.948305	ns
Mand03	B6-1	10	14.6999	0.143391	ns
Mand11	A106-1	153	147.655	0.606786	ns
Mand11	A113-1	21	29.8217	0.0956302	ns
Mand11	A117-1	91	108.209	0.105328	ns
Mand11	B101-1	36	23.8437	0.93998	ns
Mand11	B103-1	28	62.7902	0.000177117	***
Mand11	B108-1	15	85.7779	6.04017e-12	***
Mand11	B121-1	6	8.95466	0.176144	ns
Mand11	B6-1	21	22.9308	0.347678	ns
Pend03	A106-1	120	118.081	0.53246	ns
Pend03	A113-1	15	13.6988	0.548483	ns
Pend03	A117-1	78	65.8041	0.836066	ns
Pend03	B101-1	36	23.5174	0.945822	ns
Pend03	B103-1	21	29.4286	0.104086	ns
Pend03	B108-1	10	21.8815	0.0157198	*
Pend03	B121-1	6	40.9802	2.9218e-07	***
Pend03	B6-1	10	19.2242	0.0375061	*
Pend11	A106-1	190	205.725	0.206272	ns
Pend11	A113-1	21	14.5709	0.843851	ns
Pend11	A117-1	55	53.6628	0.525831	ns
Pend11	B101-1	91	65.6187	0.979379	ns
Pend11	B103-1	21	11.2333	0.958048	ns
Pend11	B108-1	10	17.1678	0.0707328	ns
Pend11	B121-1	6	29.7001	4.48192e-05	***
Pend11	B6-1	15	33.511	0.0039864	**
Sat03	A106-1	120	114.967	0.612697	ns
Sat03	A113-1	21	13.6019	0.886086	ns
Sat03	A117-1	45	40.9069	0.645941	ns
Sat03	B101-1	45	66.1349	0.0217205	*
Sat03	B103-1	21	15.2175	0.811884	ns
Sat03	B108-1	10	20.8924	0.0218566	*
Sat03	B121-1	6	25.3069	0.00029954	***
Sat03	B6-1	15	24.1829	0.0620522	ns
Sat11	A106-1	91	101.75	0.207125	ns
Sat11	A113-1	10	10.4343	0.403253	ns
Sat11	A117-1	55	49.61	0.679958	ns
Sat11	B101-1	36	38.1181	0.373281	ns
Sat11	B103-1	10	16.8972	0.0766694	ns
Sat11	B108-1	10	14.0278	0.171728	ns
Sat11	B121-1	3	11.1719	0.0108319	*
Sat11	B6-1	6	2.98222	0.811075	ns
West03	A106-1	153	146.281	0.637423	ns
West03	A113-1	15	14.0165	0.524276	ns
West03	A117-1	66	78.9889	0.131135	ns
West03	B101-1	28	15.4023	0.973869	ns
West03	B103-1	28	24.4416	0.658028	ns
West03	B108-1	21	48.7351	0.000545594	***
West03	B121-1	6	14.7014	0.0227108	*
West03	B6-1	15	31.0629	0.00861624	**
West11	A106-1	55	69.3333	0.0924912	ns
West11	A113-1	10	19.44	0.0350171	*
West11	A117-1	21	19.8639	0.529893	ns
West11	B101-1	21	18.4331	0.621455	ns
West11	B103-1	10	10.75	0.377324	ns
West11	B108-1	15	17.7778	0.274529	ns
West11	B121-1	6	6.59864	0.359563	ns
West11	B6-1	10	10.0622	0.435051	ns
Key: ns=not significant, * P<0.05, ** P<0.01, *** P<0.001

## Sheet: AFP
Allele Frequencies by Pop for Codominant Data
Data Sheet	Sheet1
Data Title
No. Loci	8
No. Samples	248
No. Pops.	10
Allele Frequencies by Populations
Locus	Allele	Gal11	Mand03	Mand11	Pend03	Pend11	Sat03	Sat11	West03	West11	Pop10
A106-1	272	0.08824	0	0	0.01613	0	0	0	0.04545	0.03333	0	1
	284	0	0	0	0	0	0.01667	0	0	0	0	2
	286	0.02941	0	0	0	0	0.01667	0	0	0	0	3
	288	0	0.0125	0	0	0	0	0	0	0	0	4
	290	0.08824	0.15	0.18421	0.06452	0.20588	0.03333	0.16667	0.09091	0.15	0	5
	292	0.05882	0.025	0	0.01613	0	0.05	0.02083	0	0	0	6
	294	0.02941	0.05	0.02632	0	0.02941	0.01667	0	0	0.01667	0	7
	296	0.02941	0.1	0.05263	0.01613	0.02941	0.01667	0.04167	0.04545	0.06667	0.0625	8
	298	0	0.0625	0.07895	0.1129	0.14706	0	0.0625	0.09091	0.06667	0.0625	9
	300	0.02941	0.0375	0.05263	0.08065	0.08824	0.11667	0.04167	0.09091	0.01667	0.0625	10
	302	0.05882	0.0125	0.05263	0.01613	0.02941	0.08333	0	0	0.03333	0.0625	11
	304	0.08824	0.0625	0.13158	0.04839	0.02941	0.1	0.125	0.18182	0.08333	0.125	12
	306	0.05882	0.0375	0.07895	0.14516	0.02941	0.08333	0.10417	0	0.01667	0.125	13
	308	0.08824	0.075	0.07895	0.01613	0.02941	0.05	0	0.09091	0.05	0	14
	310	0.11765	0.025	0.07895	0.01613	0.02941	0.08333	0.08333	0	0.15	0	15
	312	0	0	0.02632	0.1129	0	0.08333	0.04167	0.09091	0.03333	0.125	16
	314	0.02941	0.0375	0.02632	0.04839	0	0.05	0.02083	0.04545	0.05	0	17
	316	0.05882	0.05	0.07895	0.06452	0	0.03333	0.02083	0.04545	0.03333	0.0625	18
	318	0.02941	0.025	0	0	0.02941	0.01667	0.04167	0	0	0	19
	320	0.02941	0.0375	0	0.03226	0	0.01667	0	0	0	0.0625	20
	322	0	0	0	0	0	0	0.02083	0.04545	0	0	21
	328	0	0	0	0	0	0	0	0.04545	0	0	22
	332	0	0	0	0	0.05882	0	0	0	0	0	23
	334	0	0.0375	0.02632	0.04839	0.05882	0	0	0.04545	0.01667	0	24
	336	0.02941	0	0	0	0	0	0	0	0.01667	0	25
	338	0	0.0375	0	0.03226	0.05882	0.03333	0.125	0	0.06667	0	26
	342	0	0	0	0	0	0	0	0.04545	0	0	27
	348	0	0	0	0	0	0	0.02083	0	0	0	28
	358	0	0.0125	0	0	0	0	0	0	0	0	29
	462	0	0	0	0	0.02941	0	0	0	0	0	30
	468	0.02941	0.1	0.02632	0.1129	0.11765	0.06667	0.0625	0	0.1	0.1875	31
	470	0.02941	0.0125	0	0	0	0.03333	0	0	0	0.0625	32
A113-1	221	0.11111	0.04878	0	0.04839	0.1087	0.03333	0.01852	0.18182	0.05	0.05556	33
	225	0.05556	0.10976	0.125	0.08065	0.04348	0.08333	0.03704	0	0.08333	0.05556	34
	227	0	0	0	0	0	0	0.01852	0	0	0	35
	229	0.08333	0.21951	0.125	0.33871	0.21739	0.18333	0.16667	0.04545	0.13333	0.22222	36
	231	0.11111	0.10976	0.175	0.03226	0.08696	0.13333	0.12963	0.22727	0.1	0.11111	37
	233	0.5	0.41463	0.325	0.3871	0.45652	0.45	0.53704	0.31818	0.55	0.55556	38
	235	0.11111	0.09756	0.225	0.09677	0.08696	0.08333	0.09259	0.22727	0.08333	0	39
	237	0.02778	0	0.025	0.01613	0	0.03333	0	0	0	0	40
A117-1	233	0	0.025	0	0.01613	0.08696	0	0	0	0.03571	0	41
	235	0	0	0	0.01613	0	0	0.03448	0.04545	0	0	42
	237	0.20588	0.0875	0.19444	0.16129	0.19565	0.11667	0.08621	0.22727	0.05357	0.15	43
	239	0.17647	0.15	0.05556	0.22581	0.1087	0.23333	0.25862	0.13636	0.30357	0.35	44
	241	0	0.05	0.08333	0.03226	0.08696	0.1	0	0.18182	0.01786	0	45
	243	0.11765	0.1625	0.08333	0.08065	0.13043	0.13333	0.08621	0	0.10714	0.1	46
	245	0.11765	0.2	0.19444	0.08065	0.1087	0.13333	0.15517	0.09091	0.07143	0.2	47
	247	0	0.05	0.05556	0.09677	0.04348	0.03333	0.10345	0.04545	0.07143	0	48
	249	0	0.0375	0.02778	0.01613	0	0	0.03448	0	0.03571	0	49
	251	0.08824	0.05	0.05556	0.03226	0.02174	0.05	0.06897	0.04545	0.03571	0.1	50
	253	0.05882	0	0	0	0.02174	0	0	0	0	0	51
	255	0	0	0	0.01613	0	0	0	0	0	0	52
	257	0.05882	0.0125	0.02778	0.03226	0	0	0	0.04545	0.05357	0.05	53
	259	0	0.0125	0	0	0.02174	0.01667	0	0	0	0	54
	261	0	0.0125	0	0	0	0	0	0	0	0	55
	263	0	0	0	0	0.02174	0.01667	0	0	0	0	56
	267	0.02941	0	0	0	0	0	0	0.04545	0	0	57
	271	0.14706	0.1125	0.02778	0.1129	0.06522	0.1	0.12069	0.09091	0.10714	0.05	58
	273	0	0.0375	0.19444	0.08065	0.08696	0.06667	0.05172	0.04545	0.10714	0	59
B101-1	141	0	0	0	0	0	0	0.01923	0	0	0	60
	145	0.41667	0.26829	0.425	0.25806	0.1875	0.26667	0.40385	0.36364	0.3	0.31818	61
	147	0.05556	0	0	0	0.02083	0	0	0	0	0	62
	149	0	0.09756	0	0	0	0.08333	0	0	0	0	63
	151	0.19444	0.13415	0.125	0.08065	0.22917	0.16667	0.26923	0.27273	0.26667	0.40909	64
	155	0	0.0122	0	0.04839	0.0625	0.01667	0.07692	0.04545	0.01667	0.04545	65
	157	0	0.09756	0.15	0.20968	0.14583	0.06667	0.03846	0.09091	0.11667	0.04545	66
	159	0	0.07317	0.025	0.04839	0.02083	0.1	0.01923	0.04545	0.01667	0	67
	163	0.05556	0.02439	0.025	0.04839	0.0625	0.01667	0.01923	0	0	0.04545	68
	165	0	0	0	0	0	0	0	0.04545	0	0	69
	167	0.05556	0.07317	0	0.01613	0.02083	0.01667	0	0.04545	0.03333	0	70
	169	0.19444	0.12195	0.125	0.27419	0.25	0.16667	0.11538	0.04545	0.21667	0.09091	71
	171	0	0.0122	0.075	0	0	0.01667	0	0	0	0	72
	173	0	0.02439	0	0	0	0.01667	0.01923	0	0	0	73
	175	0.02778	0.06098	0	0.01613	0	0.03333	0.01923	0	0	0	74
	177	0	0	0.05	0	0	0	0	0	0	0	75
	179	0	0	0	0	0	0.01667	0	0	0	0.04545	76
	181	0	0	0	0	0	0.01667	0	0.04545	0.03333	0	77
B103-1	180	0.41667	0.2439	0.35	0.3871	0.54545	0.33333	0.17308	0.27273	0.38889	0.33333	78
	182	0.19444	0.18293	0.075	0.08065	0.15909	0.08333	0.26923	0.04545	0.11111	0.11111	79
	184	0.05556	0.15854	0.2	0.20968	0.11364	0.16667	0.19231	0.36364	0.14815	0.22222	80
	186	0.08333	0.03659	0.15	0.04839	0.04545	0.06667	0.05769	0.09091	0.07407	0	81
	188	0.22222	0.17073	0.1	0.12903	0.06818	0.25	0.15385	0.22727	0.18519	0.22222	82
	190	0	0.09756	0	0.1129	0.04545	0.06667	0.09615	0	0.03704	0.11111	83
	192	0.02778	0.06098	0.05	0.01613	0	0.03333	0	0	0	0	84
	194	0	0.03659	0.075	0.01613	0.02273	0	0.05769	0	0.03704	0	85
	196	0	0.0122	0	0	0	0	0	0	0	0	86
	198	0	0	0	0	0	0	0	0	0.01852	0	87
B108-1	174	0.21875	0.16667	0.02941	0.1129	0.13636	0.06897	0.04167	0.05556	0.10345	0.15	88
	176	0	0	0	0.04839	0	0	0	0	0.03448	0	89
	178	0	0.11538	0	0	0.11364	0.08621	0.14583	0	0.06897	0.15	90
	180	0.03125	0.26923	0.05882	0.16129	0.11364	0.08621	0.20833	0.16667	0.12069	0.1	91
	182	0.5	0.25641	0.52941	0.48387	0.38636	0.56897	0.4375	0.22222	0.34483	0.3	92
	184	0.125	0.19231	0.38235	0.16129	0.25	0.18966	0.16667	0.5	0.31034	0.2	93
	186	0.125	0	0	0.03226	0	0	0	0.05556	0.01724	0.1	94
B121-1	275	0.16667	0.15	0.05	0.1	0.15217	0.09259	0.10345	0.09091	0.15517	0.05	95
	277	0.02778	0.125	0.05	0.06667	0.1087	0.11111	0.15517	0	0.06897	0.35	96
	279	0.11111	0.125	0.2	0.05	0.04348	0.11111	0.17241	0.18182	0.08621	0.15	97
	281	0.69444	0.6	0.7	0.78333	0.69565	0.68519	0.56897	0.72727	0.68966	0.45	98
B6-1	267	0.19444	0.175	0.18421	0.14516	0.17391	0.125	0.09259	0.27273	0.25862	0.3125	99
	269	0.08333	0.075	0	0.03226	0	0	0.01852	0	0	0	100
	271	0.02778	0.0375	0.13158	0.06452	0.04348	0.01786	0.09259	0	0.03448	0.125	101
	273	0.22222	0.2125	0.28947	0.30645	0.32609	0.125	0.2037	0.13636	0.18966	0.3125	102
	275	0.16667	0.1125	0.07895	0.04839	0.13043	0.07143	0.12963	0.13636	0.12069	0.0625	103
	277	0.30556	0.375	0.31579	0.3871	0.32609	0.58929	0.46296	0.45455	0.37931	0.1875	104
	279	0	0.0125	0	0.01613	0	0.07143	0	0	0.01724	0	105
Warning! Results should be treated with caution given the following:
There is 34% missing data at the locus 'A106-1 ' in the population 'Pend11!
There is 20% missing data at the locus 'A106-1 ' in the population 'Sat11!
There is 27% missing data at the locus 'A106-1 ' in the population 'Pop10!
There is 11% missing data at the locus 'A113-1' in the population 'Pend11!
There is 10% missing data at the locus 'A113-1' in the population 'Sat11!
There is 18% missing data at the locus 'A113-1' in the population 'Pop10!
There is 10% missing data at the locus 'A117-1' in the population 'Mand11!
There is 11% missing data at the locus 'A117-1' in the population 'Pend11!
There is 6% missing data at the locus 'A117-1' in the population 'West11!
There is 9% missing data at the locus 'A117-1' in the population 'Pop10!
There is 7% missing data at the locus 'B101-1' in the population 'Pend11!
There is 13% missing data at the locus 'B101-1' in the population 'Sat11!
There is 15% missing data at the locus 'B103-1' in the population 'Pend11!
There is 13% missing data at the locus 'B103-1' in the population 'Sat11!
There is 10% missing data at the locus 'B103-1' in the population 'West11!
There is 18% missing data at the locus 'B103-1' in the population 'Pop10!
There is 11% missing data at the locus 'B108-1' in the population 'Gal11!
There is 15% missing data at the locus 'B108-1' in the population 'Mand11!
There is 15% missing data at the locus 'B108-1' in the population 'Pend11!
There is 20% missing data at the locus 'B108-1' in the population 'Sat11!
There is 18% missing data at the locus 'B108-1' in the population 'West03!
There is 9% missing data at the locus 'B108-1' in the population 'Pop10!
There is 11% missing data at the locus 'B121-1' in the population 'Pend11!
There is 10% missing data at the locus 'B121-1' in the population 'Sat03!
There is 9% missing data at the locus 'B121-1' in the population 'Pop10!
There is 11% missing data at the locus 'B6-1' in the population 'Pend11!
There is 6% missing data at the locus 'B6-1' in the population 'Sat03!
There is 10% missing data at the locus 'B6-1' in the population 'Sat11!
There is 27% missing data at the locus 'B6-1' in the population 'Pop10!

## Sheet: HFP
Heterozygosity, Fstatistics and Polymorphism by Population for Codominant Data
Data Sheet	Sheet1
Data Title
No. Loci	8
No. Samples	248
No. Pops.	10
Sample sizes, No. alleles, No. effective alleles, Information index, Observed and Expected Heterozygosity, and Fixation Index
Pop	Locus	N	Na	Ne	I	Ho	He	F
Gal11	A106-1	17	19	14.8205	2.81243	1	0.932526	-0.0723562
	A113-1	18	7	3.35751	1.54618	0.722222	0.70216	-0.0285714
	A117-1	17	9	7.225	2.06819	0.882353	0.861592	-0.0240964
	B101-1	18	7	3.85714	1.5829	0.777778	0.740741	-0.05
	B103-1	18	6	3.68182	1.48464	0.888889	0.728395	-0.220339
	B108-1	16	5	3.02959	1.3072	0.375	0.669922	0.440233
	B121-1	18	4	1.9115	0.895529	0.333333	0.476852	0.300971
	B6-1	18	6	4.62857	1.62018	0.611111	0.783951	0.220472
Mand03	A106-1	40	21	13.913	2.82004	0.95	0.928125	-0.023569
	A113-1	41	6	3.90476	1.55728	0.804878	0.743902	-0.0819672
	A117-1	40	14	8.29016	2.31284	0.9	0.879375	-0.0234542
	B101-1	41	12	7.15319	2.17504	0.731707	0.860202	0.149378
	B103-1	41	9	6.12386	1.94207	0.926829	0.836704	-0.107714
	B108-1	39	5	4.6231	1.5671	0.25641	0.783695	0.672819
	B121-1	40	4	2.41692	1.11092	0.45	0.58625	0.232409
	B6-1	40	7	4.2328	1.61992	0.675	0.76375	0.116203
Mand11	A106-1	19	15	10.6176	2.52425	0.947368	0.905817	-0.0458716
	A113-1	20	6	4.57143	1.618	0.85	0.78125	-0.088
	A117-1	18	11	7.2	2.14978	0.888889	0.861111	-0.0322581
	B101-1	20	8	4.10256	1.69659	0.8	0.75625	-0.0578512
	B103-1	20	7	4.79042	1.74248	0.85	0.79125	-0.0742496
	B108-1	17	4	2.32129	0.974674	0.0588235	0.569204	0.896657
	B121-1	20	4	1.86916	0.871133	0.5	0.465	-0.0752688
	B6-1	19	5	4.14943	1.50179	0.684211	0.759003	0.0985401
Pend03	A106-1	31	18	11.7914	2.63622	0.870968	0.915193	0.0483229
	A113-1	31	7	3.52015	1.487	0.741935	0.715921	-0.0363372
	A117-1	31	14	8.14407	2.31028	0.903226	0.877211	-0.029656
	B101-1	31	9	5.00521	1.8077	0.774194	0.800208	0.0325098
	B103-1	31	8	4.29978	1.68814	0.677419	0.76743	0.117288
	B108-1	31	6	3.30809	1.44341	0.225806	0.697711	0.676361
	B121-1	30	4	1.5859	0.751869	0.3	0.369444	0.18797
	B6-1	31	7	3.66794	1.51068	0.645161	0.727367	0.113019
Pend11	A106-1	17	16	9.63333	2.5067	0.823529	0.896194	0.0810811
	A113-1	23	6	3.51495	1.49202	0.826087	0.715501	-0.154557
	A117-1	23	13	9.12069	2.35174	0.956522	0.890359	-0.07431
	B101-1	24	9	5.53846	1.86737	0.875	0.819444	-0.0677966
	B103-1	22	7	2.8982	1.42032	0.454545	0.654959	0.305994
	B108-1	22	5	3.90323	1.47995	0.409091	0.743802	0.45
	B121-1	23	4	1.92015	0.916502	0.173913	0.479206	0.637081
	B6-1	23	5	3.81949	1.43704	0.695652	0.738185	0.0576184
Sat03	A106-1	30	20	14.4	2.80204	0.933333	0.930556	-0.00298507
	A113-1	30	7	3.7037	1.5799	0.666667	0.73	0.086758
	A117-1	30	11	7.56303	2.16822	0.766667	0.867778	0.116517
	B101-1	30	14	6.61765	2.15864	0.9	0.848889	-0.0602094
	B103-1	30	7	4.58015	1.69293	0.8	0.781667	-0.0234542
	B108-1	29	5	2.63636	1.24318	0.413793	0.62069	0.333333
	B121-1	27	4	1.98909	0.967646	0.222222	0.497257	0.553103
	B6-1	28	6	2.57049	1.28039	0.428571	0.610969	0.298539
Sat11	A106-1	24	16	10.6667	2.54066	0.791667	0.90625	0.126437
	A113-1	27	7	2.91018	1.38748	0.740741	0.656379	-0.128527
	A117-1	29	10	7.09705	2.12121	0.896552	0.859096	-0.0435986
	B101-1	26	10	3.87393	1.67117	0.730769	0.741864	0.0149551
	B103-1	26	7	5.58678	1.8162	0.846154	0.821006	-0.0306306
	B108-1	24	5	3.50152	1.40028	0.416667	0.71441	0.416768
	B121-1	29	4	2.5758	1.14775	0.344828	0.611772	0.436346
	B6-1	27	6	3.44681	1.46001	0.555556	0.709877	0.217391
West03	A106-1	11	14	11	2.52392	0.909091	0.909091	1.11022e-16
	A113-1	11	5	4.17241	1.48827	0.818182	0.760331	-0.076087
	A117-1	11	11	7.5625	2.19737	0.909091	0.867769	-0.047619
	B101-1	11	9	4.4	1.78321	0.818182	0.772727	-0.0588235
	B103-1	11	5	3.72308	1.41743	0.636364	0.731405	0.129944
	B108-1	9	5	3	1.30059	0.333333	0.666667	0.5
	B121-1	11	3	1.75362	0.759547	0.181818	0.429752	0.576923
	B6-1	11	4	3.14286	1.25613	0.818182	0.681818	-0.2
West11	A106-1	30	18	11.6129	2.64234	0.833333	0.913889	0.0881459
	A113-1	30	6	2.88462	1.39166	0.7	0.653333	-0.0714286
	A117-1	28	12	6.81739	2.19933	0.892857	0.853316	-0.0463378
	B101-1	30	8	4.45545	1.6589	0.8	0.775556	-0.0315186
	B103-1	27	8	4.37838	1.71742	0.777778	0.771605	-0.008
	B108-1	29	7	4.05301	1.59071	0.448276	0.75327	0.404893
	B121-1	29	4	1.95354	0.941088	0.344828	0.488109	0.293544
	B6-1	29	6	3.80543	1.47409	0.586207	0.737218	0.204839
Pop10	A106-1	8	11	9.14286	2.30667	0.875	0.890625	0.0175439
	A113-1	9	5	2.65574	1.22608	0.666667	0.623457	-0.0693069
	A117-1	10	7	4.7619	1.73398	0.9	0.79	-0.139241
	B101-1	11	7	3.50725	1.51001	0.545455	0.714876	0.236994
	B103-1	9	5	4.26316	1.52296	0.777778	0.765432	-0.016129
	B108-1	10	6	5.12821	1.71273	0.6	0.805	0.254658
	B121-1	10	4	2.85714	1.16112	0.4	0.65	0.384615
	B6-1	8	5	4	1.47406	0.75	0.75	0
F Statistics and Estimates of Nm
All Pops.		A106-1	A113-1	A117-1	B101-1	B103-1	B108-1	B121-1	B6-1	Mean
	Fis	0.0212499	-0.0642657	-0.0335225	0.00991896	0.0018427	0.496439	0.356713	0.11188	0.112532
	Fit	0.0494151	-0.0296963	-0.00342343	0.044382	0.0362626	0.522897	0.382323	0.140503	0.142833
	Fst	0.0287767	0.0324819	0.0291228	0.0348083	0.0344834	0.0525413	0.0398105	0.0322291	0.0355318
	Nm	8.43758	7.44659	8.33434	6.93219	6.99986	4.50816	6.02974	7.50696	6.78596
Percentage of Polymorphic Loci
Population	%P
Gal11	1
Mand03	1
Mand11	1
Pend03	1
Pend11	1
Sat03	1
Sat11	1
West03	1
West11	1
Pop10	1
Mean	1
Warning! Results should be treated with caution given the following:
There is 34% missing data at the locus 'A106-1 ' in the population 'Pend11!
There is 20% missing data at the locus 'A106-1 ' in the population 'Sat11!
There is 27% missing data at the locus 'A106-1 ' in the population 'Pop10!
There is 11% missing data at the locus 'A113-1' in the population 'Pend11!
There is 10% missing data at the locus 'A113-1' in the population 'Sat11!
There is 18% missing data at the locus 'A113-1' in the population 'Pop10!
There is 10% missing data at the locus 'A117-1' in the population 'Mand11!
There is 11% missing data at the locus 'A117-1' in the population 'Pend11!
There is 6% missing data at the locus 'A117-1' in the population 'West11!
There is 9% missing data at the locus 'A117-1' in the population 'Pop10!
There is 7% missing data at the locus 'B101-1' in the population 'Pend11!
There is 13% missing data at the locus 'B101-1' in the population 'Sat11!
There is 15% missing data at the locus 'B103-1' in the population 'Pend11!
There is 13% missing data at the locus 'B103-1' in the population 'Sat11!
There is 10% missing data at the locus 'B103-1' in the population 'West11!
There is 18% missing data at the locus 'B103-1' in the population 'Pop10!
There is 11% missing data at the locus 'B108-1' in the population 'Gal11!
There is 15% missing data at the locus 'B108-1' in the population 'Mand11!
There is 15% missing data at the locus 'B108-1' in the population 'Pend11!
There is 20% missing data at the locus 'B108-1' in the population 'Sat11!
There is 18% missing data at the locus 'B108-1' in the population 'West03!
There is 9% missing data at the locus 'B108-1' in the population 'Pop10!
There is 11% missing data at the locus 'B121-1' in the population 'Pend11!
There is 10% missing data at the locus 'B121-1' in the population 'Sat03!
There is 9% missing data at the locus 'B121-1' in the population 'Pop10!
There is 11% missing data at the locus 'B6-1' in the population 'Pend11!
There is 6% missing data at the locus 'B6-1' in the population 'Sat03!
There is 10% missing data at the locus 'B6-1' in the population 'Sat11!
There is 27% missing data at the locus 'B6-1' in the population 'Pop10!

## Sheet: Gal03
8	18	1	18
			Gal03
SampleID gel	Pop	A106-1	A106-2	A113-1	A113-2	A117-1	A117-2	B101-1	B101-2	B103-1	B103-2	B108-1	B108-2	B121-1	B121-2	B6-1	B6-2
gal140	Gal03	290	304	233	237	239	243	145	145	184	188	174	182	281	281	277	277
gal141	Gal03	9	9	229	235	243	271	145	167	180	184	9	9	275	281	267	275
gal142	Gal03	290	304	221	233	9	9	145	175	180	188	174	180	275	275	273	277
gal143	Gal03	314	318	221	229	239	245	145	169	180	192	174	186	281	281	267	277
gal144	Gal03	296	302	233	233	237	237	145	151	180	186	174	174	275	281	273	277
gal145	Gal03	292	316	225	235	251	267	145	151	180	188	182	182	275	281	269	269
gal146	Gal03	290	300	225	233	257	271	169	169	182	188	182	186	275	279	275	275
gal147	Gal03	308	310	233	233	239	253	151	169	182	188	174	174	281	281	267	277
gal148	Gal03	272	310	233	233	239	271	145	145	180	180	182	186	281	281	273	273
gal149	Gal03	304	316	233	233	245	271	145	145	180	180	182	182	277	281	271	275
gal150	Gal03	306	308	233	233	237	251	145	163	180	188	182	182	281	281	273	273
gal151	Gal03	292	336	231	235	237	257	145	169	180	182	9	9	281	281	277	277
gal152	Gal03	272	294	221	233	239	243	145	169	180	182	182	186	281	281	267	267
gal153	Gal03	308	310	231	235	237	239	145	151	182	186	182	182	281	281	267	277
gal154	Gal03	286	310	231	233	245	253	151	167	180	188	184	184	279	279	267	275
gal155	Gal03	272	302	231	233	245	271	147	151	180	182	184	184	281	281	269	277
gal156	Gal03	320	470	221	233	243	251	151	169	180	188	182	182	279	281	273	277
gal22-2003	Gal03	306	468	229	233	237	237	147	163	182	186	182	182	281	281	273	275

## Sheet: Gal11
8	41	1	41
			Gal11
SampleID gel	Pop	A106-1	A106-2	A113-1	A113-2	A117-1	A117-2	B101-1	B101-2	B103-1	B103-2	B108-1	B108-2	B121-1	B121-2	B6-1	B6-2
pcgal107	Gal11	308	314	229	235	237	271	151	169	180	192	174	174	279	281	273	277
gal12-1	Gal11	290	468	233	235	271	271	149	169	184	188	182	182	279	281	269	277
gal15-1	Gal11	290	320	221	229	245	245	157	169	180	190	174	174	279	281	275	275
gal18-1	Gal11	290	310	233	233	239	243	145	155	182	186	184	184	281	281	269	269
gal19-3	Gal11	296	320	233	235	251	251	149	169	180	188	182	182	277	281	277	277
gal22-7	Gal11	308	358	225	233	237	271	145	149	182	188	180	182	279	281	273	277
gal38-1	Gal11	298	468	225	233	243	259	145	149	180	182	174	174	279	281	267	273
gal39-1	Gal11	288	298	229	233	243	271	157	167	184	186	182	182	275	275	273	277
gal4-1	Gal11	292	468	231	231	239	257	169	169	182	192	174	174	281	281	269	277
gal45-1	Gal11	290	300	231	233	245	271	145	149	190	192	174	182	281	281	277	277
gal52-3	Gal11	290	296	229	233	247	271	167	175	184	188	9	9	275	281	9	9
pcgal35	Gal11	294	304	229	233	237	243	151	157	180	192	178	178	277	277	277	277
pcgal37	Gal11	310	468	221	233	241	249	145	157	180	188	180	180	281	281	273	277
pcgal38	Gal11	296	296	229	233	241	243	145	175	188	190	180	180	275	281	267	267
pcgal40	Gal11	9	9	229	233	233	243	159	159	184	190	180	180	281	281	267	273
pcgal41	Gal11	290	334	233	233	243	245	151	175	182	194	180	180	275	281	277	277
pcgal42	Gal11	290	468	225	233	239	245	151	157	184	188	178	178	277	281	273	273
pcgal43	Gal11	294	306	231	233	245	273	145	169	186	196	174	174	281	281	271	275
pcgal44	Gal11	308	318	225	229	239	245	145	145	180	188	180	180	279	281	271	277
pcgal47	Gal11	290	308	231	233	233	239	151	151	182	184	180	180	279	281	267	277
pcgal48	Gal11	308	334	229	233	245	271	145	159	180	190	180	180	281	281	275	277
pcgal55	Gal11	298	304	229	229	241	273	145	167	184	188	182	184	9	9	267	273
pcgal56	Gal11	292	308	229	233	245	251	145	163	180	188	178	182	275	281	275	275
pcgal57	Gal11	318	468	225	233	237	239	159	173	182	182	180	180	277	281	267	275
pcgal59	Gal11	304	316	233	235	241	273	151	159	182	184	182	182	279	281	273	277
pcgal60	Gal11	290	302	229	233	239	239	173	145	180	194	182	184	277	281	267	273
pcgal67	Gal11	316	468	229	231	245	271	145	145	180	182	9	9	281	281	269	277
pcgal73	Gal11	320	338	225	225	245	261	145	157	180	180	174	184	277	277	267	277
rand-gal-104	Gal11	296	296	229	233	237	243	159	175	180	188	182	184	275	275	267	277
rand108	Gal11	294	338	225	235	243	245	169	169	180	190	184	184	281	281	273	275
rand-gal-143	Gal11	304	316	229	233	237	243	151	157	184	188	184	184	275	281	267	277
rand-gal-146	Gal11	294	300	233	233	243	245	145	145	180	188	182	182	275	281	273	273
rand-gal-148	Gal11	290	316	225	233	247	249	167	167	182	182	184	184	281	281	267	277
rand-gal-152	Gal11	304	306	229	235	243	245	163	171	180	184	184	184	281	281	267	273
rand-gal-155	Gal11	290	306	221	231	239	247	145	167	190	194	180	180	281	281	271	275
rand-gal-159	Gal11	338	470	229	235	243	245	145	149	180	182	174	184	281	281	269	273
rand-gal-160	Gal11	296	468	221	235	237	239	149	149	184	188	182	182	281	281	277	277
rand-gal-167	Gal11	300	314	233	233	239	251	145	145	182	190	180	180	275	275	277	277
rand-gal-170	Gal11	298	334	231	233	9	9	169	175	180	184	178	182	281	281	267	273
rand-gal-171	Gal11	296	314	231	233	247	249	151	157	184	192	178	182	277	277	277	279
pc-rand-86	Gal11	290	298	233	233	239	245	151	151	180	182	178	178	279	279	277	277

## Sheet: West03
8	30	1	30
			West03
SampleID gel	Pop	A106-1	A106-2	A113-1	A113-2	A117-1	A117-2	B101-1	B101-2	B103-1	B103-2	B108-1	B108-2	B121-1	B121-2	B6-1	B6-2
west1-10	West03	306	310	233	235	239	239	151	157	182	188	180	184	275	281	267	277
west1-11	West03	290	298	225	231	239	271	145	151	180	184	182	182	279	281	267	271
west1-12	West03	300	308	233	233	239	251	169	169	9	9	182	186	277	281	267	277
west1-13	West03	302	310	231	233	239	251	145	155	180	188	182	182	277	281	277	277
west1-14	West03	302	336	233	235	239	273	169	181	184	188	180	184	9	9	273	277
west1-5	West03	468	468	233	233	239	257	145	169	180	188	180	184	281	281	273	277
west1-6	West03	310	338	231	233	245	271	145	145	186	186	184	184	275	281	267	275
west1-7	West03	308	468	225	233	239	257	151	169	180	180	174	180	277	281	275	275
west1-8	West03	294	314	225	231	239	243	159	169	180	180	182	184	275	281	277	277
west1-9	West03	338	338	233	235	239	247	151	169	180	194	182	182	281	281	267	273
westII-15	West03	310	334	229	231	9	9	151	157	180	184	184	184	281	281	267	273
westII-16	West03	290	338	225	233	243	243	145	151	9	9	174	182	277	281	267	271
westII-17	West03	304	304	229	231	9	9	145	151	182	194	184	184	281	281	267	267
westII-18	West03	290	296	233	233	237	249	145	157	180	190	9	9	275	275	273	273
westII-19	West03	296	316	233	233	239	271	151	169	184	184	184	184	281	281	273	279
westII-20	West03	290	304	233	233	237	271	151	169	180	188	182	182	281	281	267	273
westII-21	West03	290	468	221	235	245	273	145	181	182	184	182	184	281	281	273	277
westII-22	West03	298	314	233	233	239	247	145	157	180	186	174	182	281	281	273	277
westII-23	West03	298	310	229	233	243	245	151	151	182	188	176	182	275	275	275	275
westII-24	West03	310	312	233	233	239	273	145	151	180	190	182	184	275	275	277	277
westIII-25	West03	316	468	221	233	239	247	157	169	9	9	184	184	281	281	267	277
westIII-26	West03	272	298	225	229	237	257	151	151	184	188	182	182	279	281	267	277
westIII-27	West03	304	314	229	233	245	271	145	145	180	198	178	178	279	281	275	275
westIII-28	West03	310	310	233	235	273	273	145	157	180	180	180	180	281	281	9	9
westIII-29	West03	308	468	229	233	233	241	145	167	180	180	174	182	281	281	277	277
westIII-30	West03	296	304	233	233	233	243	169	169	182	188	176	180	281	281	267	267
westIII-31	West03	290	312	233	233	239	273	145	167	182	184	178	178	281	281	273	277
westIII-32	West03	290	290	229	233	239	247	145	151	180	188	184	184	281	281	277	277
westIII-33	West03	272	296	221	233	239	249	145	169	180	188	174	174	279	279	267	277
westIII-34	West03	290	310	229	233	243	271	151	157	180	186	182	182	281	281	277	277

## Sheet: Wesr11
8	11	1	11
			West11
SampleID gel	Pop	A106-1	A106-2	A113-1	A113-2	A117-1	A117-2	B101-1	B101-2	B103-1	B103-2	B108-1	B108-2	B121-1	B121-2	B6-1	B6-2
west1-1-2011	West11	302	470	233	233	245	271	145	169	180	190	182	184	9	9	267	275
west11-2-2011	West11	304	468	229	231	243	245	145	145	182	188	184	184	279	279	267	271
west13-1-2011	West11	306	306	229	233	237	239	145	151	180	184	174	184	275	281	273	273
west14-1-2011	West11	9	9	221	225	239	251	169	179	180	188	174	182	277	277	9	9
west15-1-2011	West11	312	468	233	233	239	251	145	155	180	180	178	182	277	281	277	277
west17-1-2011	West11	298	304	231	233	243	245	151	163	182	188	182	182	277	281	267	271
west3-1-2011	West11	312	468	229	233	239	257	151	157	180	184	174	180	281	281	273	277
west4-1-2011	West11	9	9	9	9	237	245	151	151	9	9	178	178	281	281	9	9
west5-2-2011	West11	300	316	233	233	239	239	145	145	184	184	186	186	277	277	267	273
west6-1-2011	West11	9	9	9	9	9	9	151	151	9	9	9	9	281	281	9	9
west9-1-2011	West11	296	320	229	233	237	239	151	151	188	190	180	182	277	279	267	273

## Sheet: Mand03
8	20	1	20
			Mand03
SampleID gel	Pop	A106-1	A106-2	A113-1	A113-2	A117-1	A117-2	B101-1	B101-2	B103-1	B103-2	B108-1	B108-2	B121-1	B121-2	B6-1	B6-2
mand120	Mand03	290	300	225	231	243	273	145	145	184	188	182	182	281	281	273	277
mand121	Mand03	290	298	225	229	241	245	145	157	180	192	184	184	281	281	271	273
mand122	Mand03	290	304	233	235	241	245	157	171	180	184	184	184	275	281	267	277
mand123	Mand03	294	300	225	229	239	273	145	169	180	186	184	184	279	281	271	271
mand124	Mand03	290	310	233	233	245	273	145	145	184	194	184	184	281	281	273	277
mand125	Mand03	304	316	231	235	237	271	157	157	180	180	180	180	281	281	277	277
mand126	Mand03	304	310	229	235	237	245	145	145	180	192	182	182	279	281	275	277
mand127	Mand03	310	312	231	233	9	9	163	169	184	186	184	184	281	281	9	9
mand128	Mand03	298	308	233	233	9	9	145	151	180	184	9	9	277	281	271	273
mand129	Mand03	290	316	225	229	245	273	145	151	180	194	174	184	281	281	277	277
mand130	Mand03	308	314	229	235	245	257	145	177	184	188	182	182	279	281	267	277
mand131	Mand03	302	306	233	235	237	247	145	169	180	186	182	182	281	281	273	273
mand132	Mand03	304	468	231	233	251	251	157	169	180	180	9	9	279	281	273	277
mand133	Mand03	290	298	225	233	273	273	159	171	186	186	182	182	281	281	267	277
mand134	Mand03	304	316	231	235	237	273	145	157	180	186	184	184	275	281	267	267
mand135	Mand03	9	9	233	235	239	247	145	151	182	184	182	182	277	281	267	273
mand136	Mand03	296	334	231	235	237	241	145	171	180	188	182	182	279	279	273	277
mand137	Mand03	290	296	233	233	237	245	145	151	180	182	182	182	279	281	271	273
mand138	Mand03	302	308	233	235	237	243	151	177	182	194	9	9	279	281	267	273
mand139	Mand03	306	306	231	237	243	249	145	169	184	188	182	182	281	281	275	275

[truncated: 7 more sheets: Mand11, Pend03, Pend11, Sat03, Sheet9, 2003, 2011]
